# Supplementary material for: Effect of educational intervention on risk factors of cardiovascular diseases among school teachers: a quasi-experimental study in a suburb of Kolkata, West Bengal, India
Source: Springer Nature journal article supplement (doi:10.1186/s12889-023-17227-w), 2023-11-21
Supplement: MOESM1 [file 26339614]

# Cardiovascular Diseases: Risk factors and Prevention

Presented by-

Dr. Anubrata Karmakar

MD CM PGT

All India Institute of Hygiene & Public Health,  
Kolkata

# What are cardiovascular diseases (CVDs)?

| CVDs due to atherosclerosis                                                                                                                                                                                                                                                                                                                                          | Other cardiovascular diseases                                                                                                                                                                                                                                                                 |
|----------------------------------------------------------------------------------------------------------------------------------------------------------------------------------------------------------------------------------------------------------------------------------------------------------------------------------------------------------------------|-----------------------------------------------------------------------------------------------------------------------------------------------------------------------------------------------------------------------------------------------------------------------------------------------|
| <ol style="list-style-type: none"><li data-bbox="86 535 898 735">1. Ischaemic heart disease or coronary artery disease (e.g. heart attack)</li><li data-bbox="86 835 917 963">2. Cerebrovascular disease (e.g. stroke)</li><li data-bbox="86 1063 898 1342">3. Diseases of the aorta and arteries, including hypertension and peripheral vascular disease.</li></ol> | <ol style="list-style-type: none"><li data-bbox="975 564 1690 614">1. Congenital heart disease</li><li data-bbox="975 678 1690 728">2. Rheumatic heart disease</li><li data-bbox="975 792 1516 842">3. Cardiomyopathies</li><li data-bbox="975 906 1574 956">4. Cardiac arrhythmias</li></ol> |

# What are the Risk Factors?

| Behavioural risk factors                                                                                                                                                                    | Metabolic risk factors                                                                                                                                                                                                | Other risk factors                                                                                                                                                                                                                                                 |
|---------------------------------------------------------------------------------------------------------------------------------------------------------------------------------------------|-----------------------------------------------------------------------------------------------------------------------------------------------------------------------------------------------------------------------|--------------------------------------------------------------------------------------------------------------------------------------------------------------------------------------------------------------------------------------------------------------------|
| <ul style="list-style-type: none"><li>1. tobacco use</li><li>2. physical inactivity</li><li>3. unhealthy diet (rich in salt, fat and calories)</li><li>4. harmful use of alcohol.</li></ul> | <ul style="list-style-type: none"><li>5. raised blood pressure (hypertension)</li><li>6. raised blood sugar (diabetes)</li><li>7. raised blood lipids (e.g. cholesterol)</li><li>8. overweight and obesity.</li></ul> | <ul style="list-style-type: none"><li>9. poverty and low educational status</li><li>10. advancing age</li><li>11. gender</li><li>12. inherited (genetic) disposition (<b>Family History</b>)</li><li>13. psychological factors (e.g. stress, depression)</li></ul> |
| <b>Modifiable</b>                                                                                                                                                                           |                                                                                                                                                                                                                       |                                                                                                                                                                                                                                                                    |

# Prevention: reducing exposure to risk factors

- To prevent heart attacks and strokes, the total cardiovascular risk needs to be reduced by **lowering all modifiable risk factors**.
- Cardiovascular risk factors such as **hypertension, diabetes and hyperlipidaemia cluster together** and are major risk factors for strokes and heart attacks
- CVD Prevention needs a **life course** approach

# DIETARY HABITS

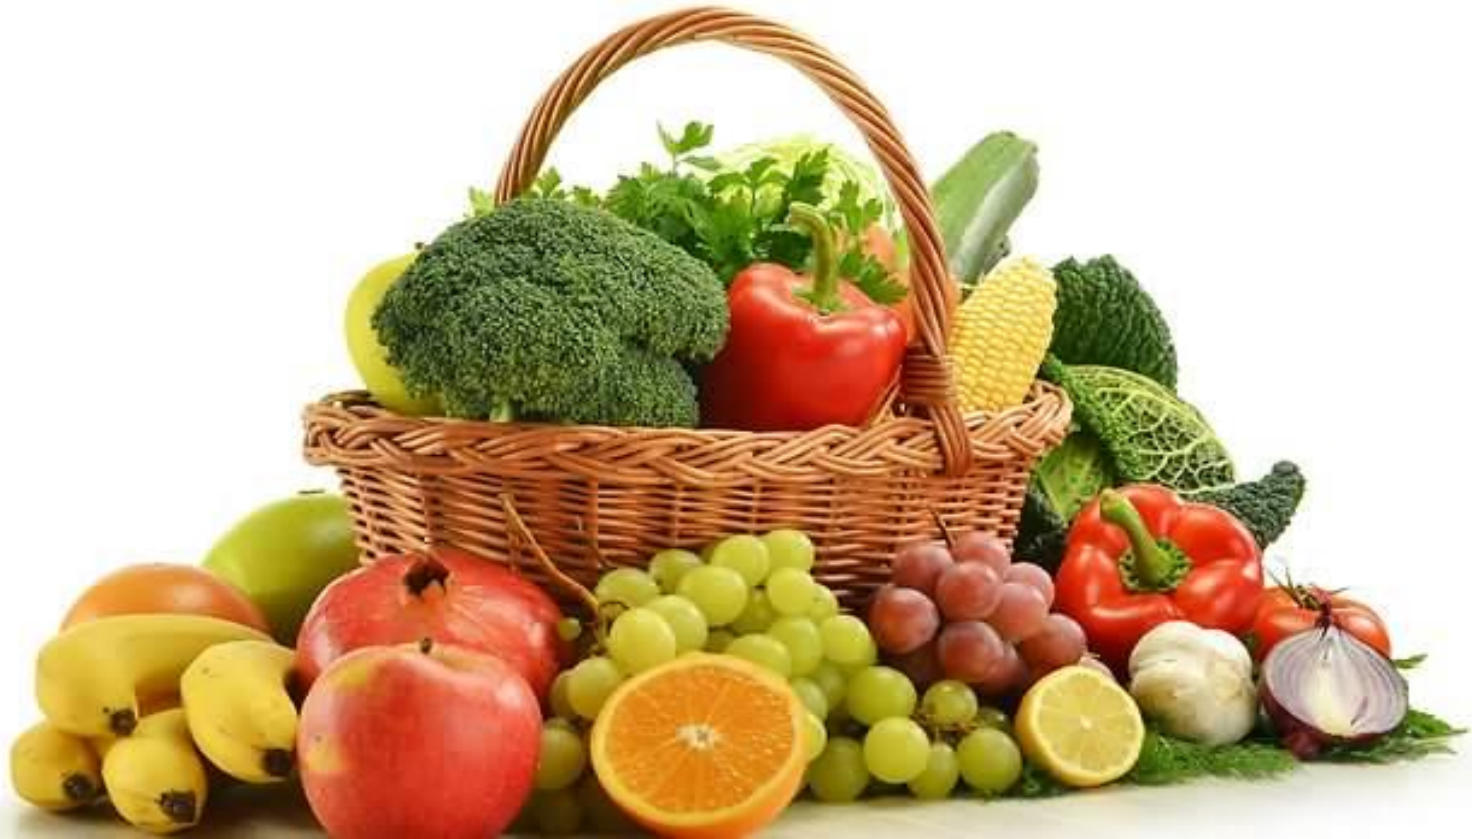

# What is a balanced diet ?

A diet that contains **adequate** amounts of all **necessary** nutrients required for healthy growth and activity

# Different food groups

## THE TEN FOOD GROUPS ARE:

1. Grains, white roots and tubers, and plantains
2. Pulses (beans, peas and lentils)
3. Nuts and seeds
4. Dairy
5. Meat, poultry and fish
6. Eggs
7. Dark green leafy vegetables
8. Vitamin A-rich fruits and vegetables
9. Other vegetables
10. Other fruits

# SMART PLATE

## What's on Your Healthy Plate?

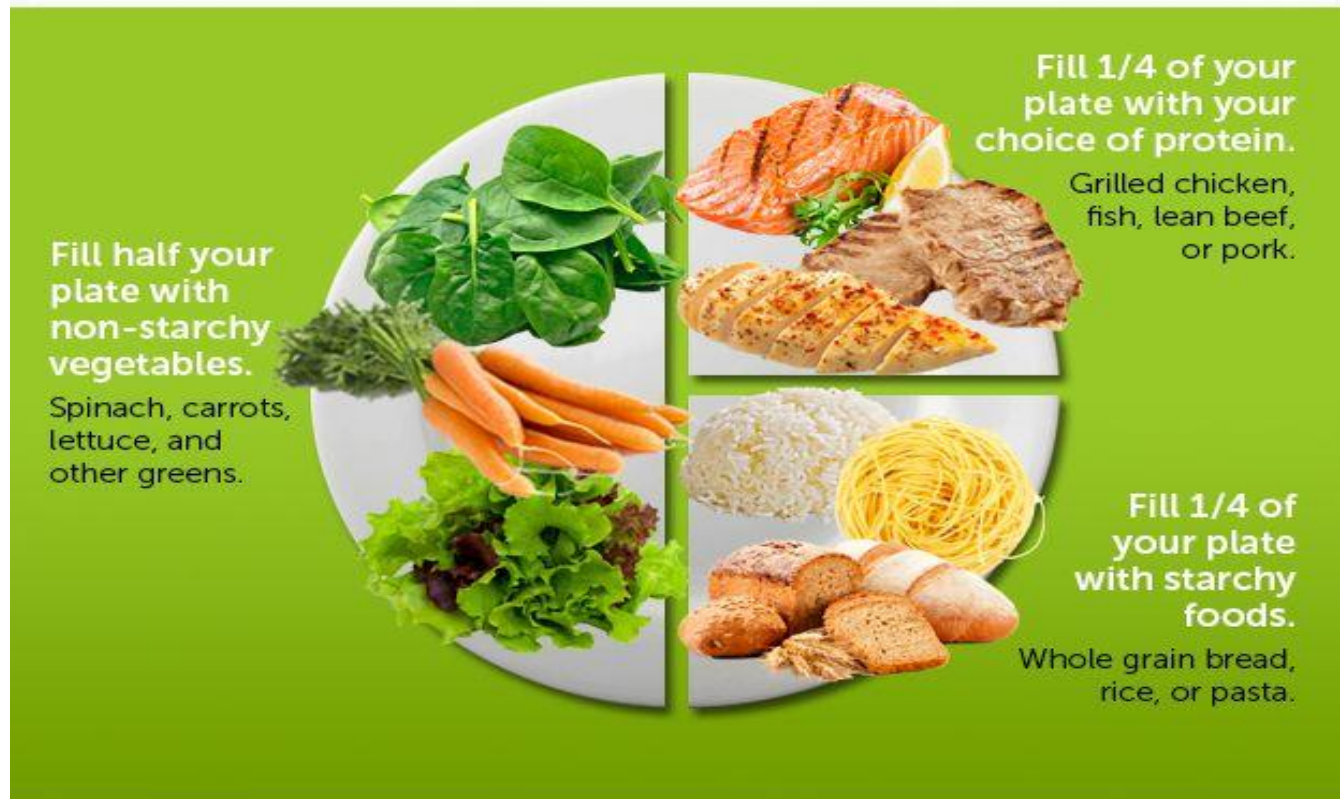

Brought to you by:  everyday HEALTH



# WHAT IS JUNK FOOD ?

- Food with high calories
- Rich in salt, sugar and fat
- With little nutritive value.

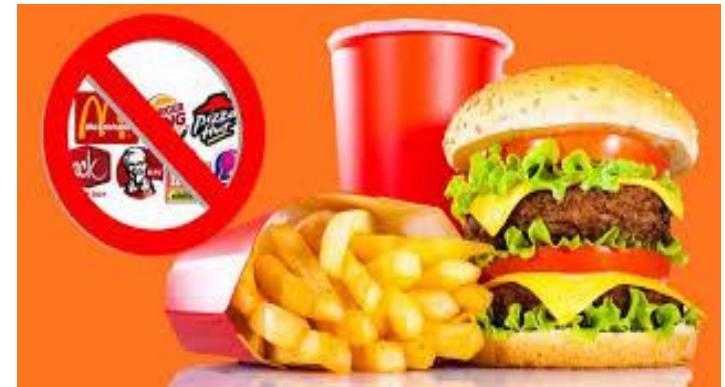

- Tasty and usually cheap.
- Contains little or no fibre.

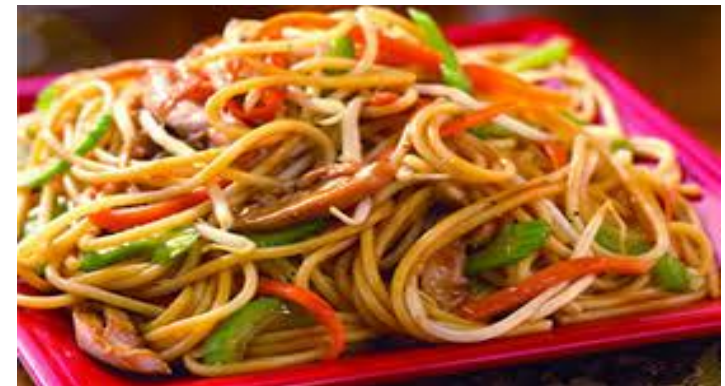

# Healthy Diet

- **Wash** vegetables & fruits properly before cooking.
- Develop the habit of taking meals at **regular intervals**.
- Use **boiling, steaming** etc. as methods of cooking, **avoid fried food**
- Increase of locally available seasonal **fruits** and **green leafy vegetables** in the diet.
- Vegetable- **3-4 serving/bowl** & **at least one fruit** daily

# Healthy Diet

- Restrict intake of ghee, oils  
(Recommended-**500gm/person/month**)
- **Trans-fat** (margarine, Vanaspati, Dalda)  
consumption should be **avoided**
- Reduce salt intake **<5gm per day**
- Avoid intake of aerated drinks (cola),  
fast/processed food (Chips, burger,  
samosa etc.).

# Physical activity/ দৈহিক পরিশ্রম

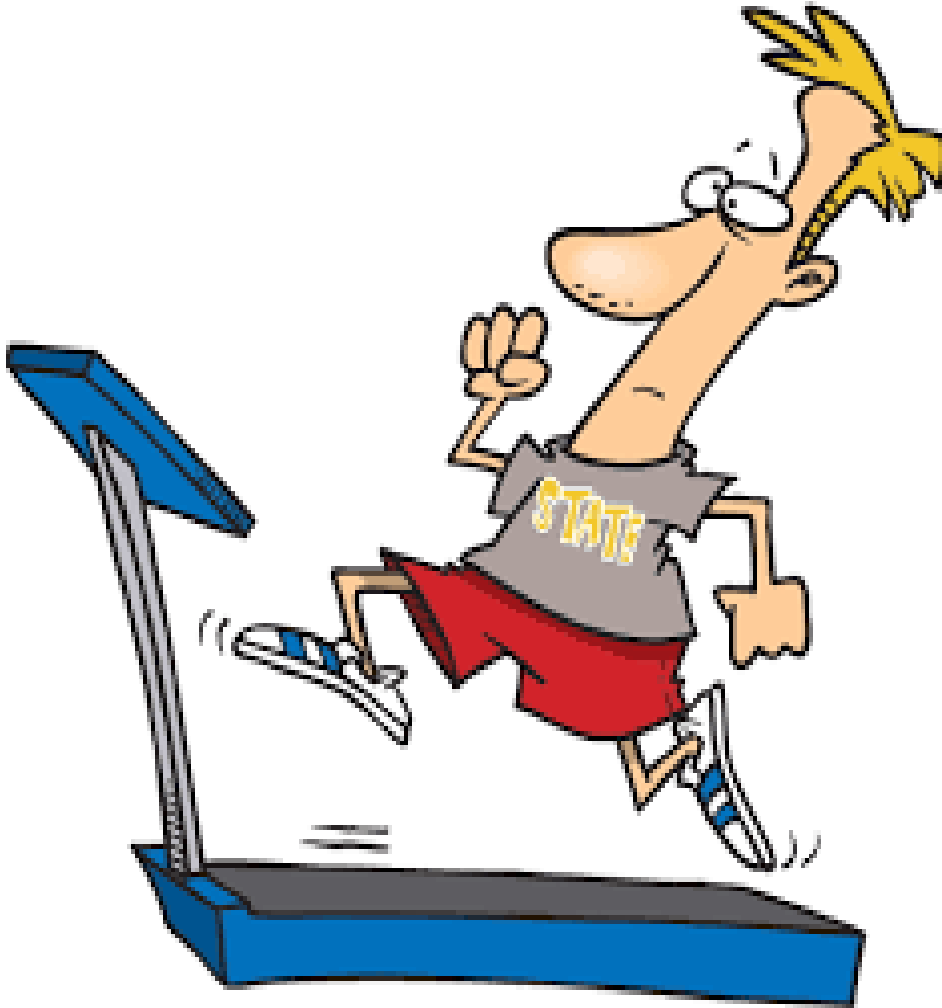

Physical activity is defined as any bodily movement produced by skeletal muscles that requires energy expenditure

# Benefits of Regular Physical Activity

- **Physical Benefits**
  - Controls weight
  - Improves immunity
  - Improves blood circulation
  - Strengthen muscles
  - Strengthen heart
  - Improves balance and posture

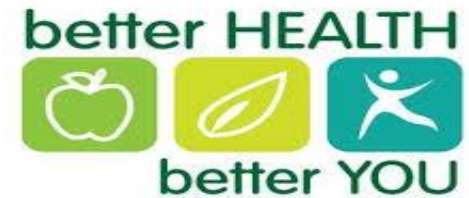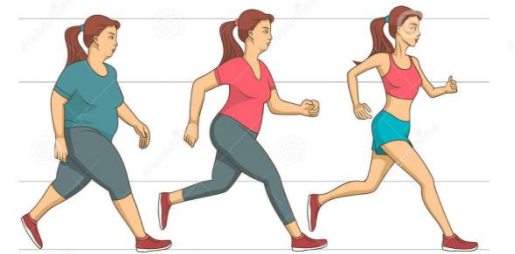

# Benefits of Regular Physical Activity

- **Mental benefits:**
  - Reduce stress
  - Reduce depression
  - Reduce anxiety
  - Helps to control emotions
  - Improves sleep quality
  - Improves concentration
  - Increases Social integration and bonding

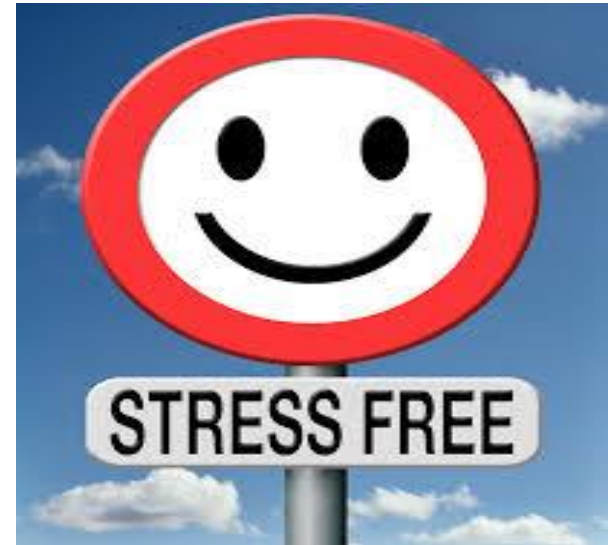

# Health Benefits of Regular Physical Activity

- Reduce risk of obesity
- Reduce your risk of cardiovascular disease
- Reduce your risk for type 2 diabetes and metabolic syndrome
- Reduce your risk of some cancers
- Strengthen your bones and muscles

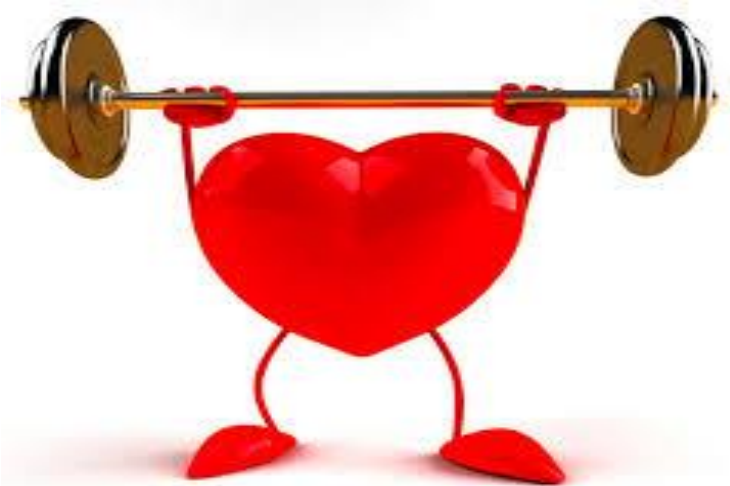

# Recommendations for Physical Activity

- **For Children 6-17 years:**

Everyday 60 minutes of moderate to vigorous PA

- **For Adults(18-64 years):**

30 minutes of moderate PA for at least 5 days/week i.e. 150 minutes a week or 25 minutes vigorous PA 3days/week i.e. 75 minutes/week

- **For Older Adults(65 years old or older):**

Similar to above- 30 minutes of moderate PA; at least 5 days/week



# What counts as moderate physical activity

Any physical activity is better than none. It is never too late to get more active to improve health. Activities could include:

walking

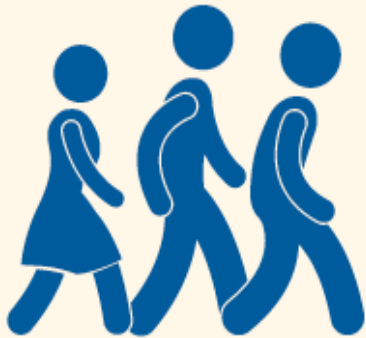

gardening

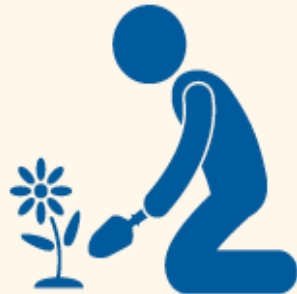

hiking

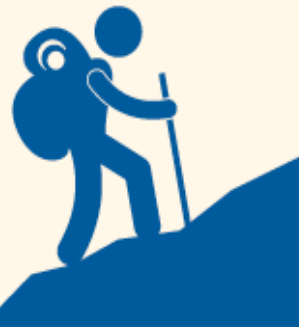

dancing

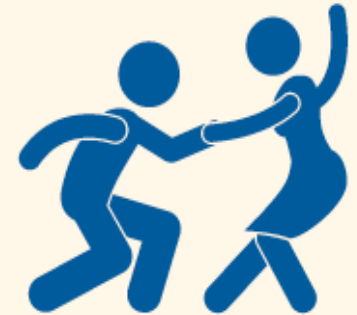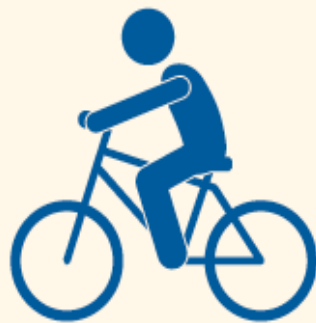

cycling

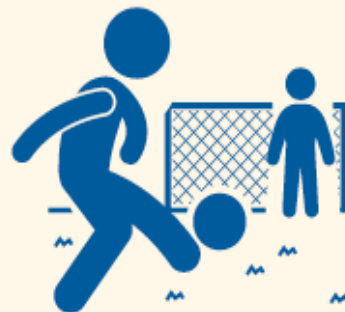

active recreation

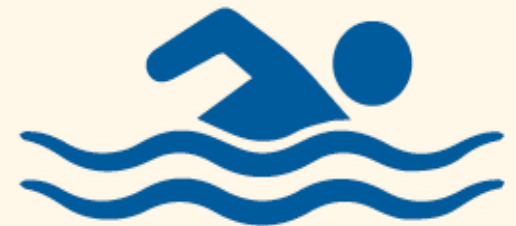

swimming

# Myths vs Facts

- Myth: Consumption of junk food and fast food leads to indigestion but has no relationship with CVD
- Fact: Junk food and Fast food increases the risk of CVD

# Myths vs Facts

- Myth: Only exercising in gym will lower a person's chance of developing CVD
- Fact: Brisk walking, cycling, swimming, gardening, aerobic (free hand exercise) are equally good

# Myths vs Facts

- Myth: Only exercising in gym will lower a person's chance of developing CVD
- Fact: Brisk walking, cycling, swimming, gardening, aerobic (free hand exercise) are equally good

“I am a housewife. I don’t get time to exercise.” or,  
“I do lot of work in house, I don’t need any extra exercise”

- It can be done in the evening also.
- Only 30 minutes is required from 24 hours.
- That too can be done in 3 bouts of 10 minutes also.

“I am old, I have knee and back pain”

- It can be done in the evening also.
- Only 30 minutes is required from 24 hours.
- That too can be done in 3 bouts of 10 minutes also.

# Sedentary habits

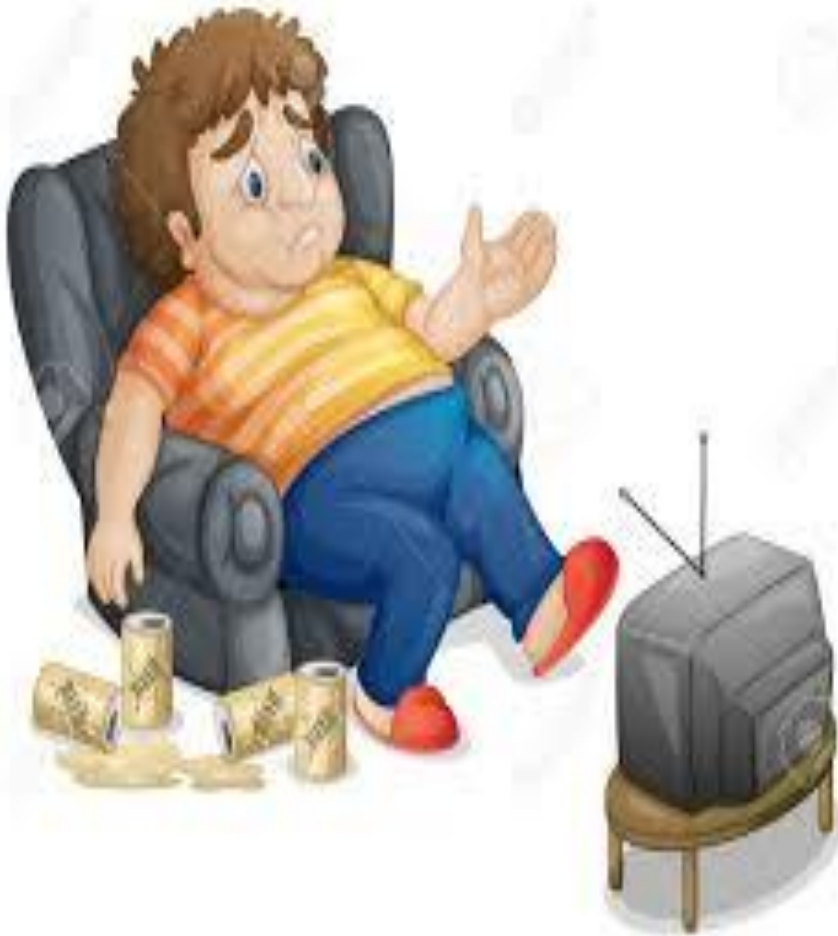

- Watching TV for long duration
- Computer work/ surfing internet
- Use of smartphones/ mobile
- Sitting and gossiping
- Excessive sleeping
- Job related- Teachers, IT professionals, doctors, lawyers etc.

# Attention!!!

- **Screen time use** (TV, Computer, Mobile etc.) should be restricted to **2 hours/day**
- **Sleep** at least **7-8 hours/day**
- **Sleep deprivation** is also a risk factor for obesity, CVDs and metabolic syndrome



# ADDICTION

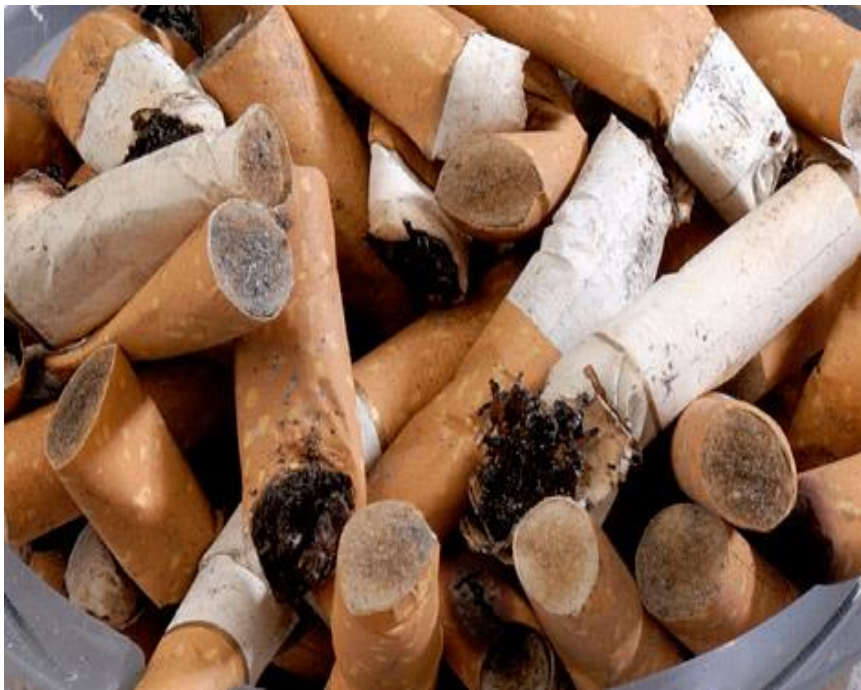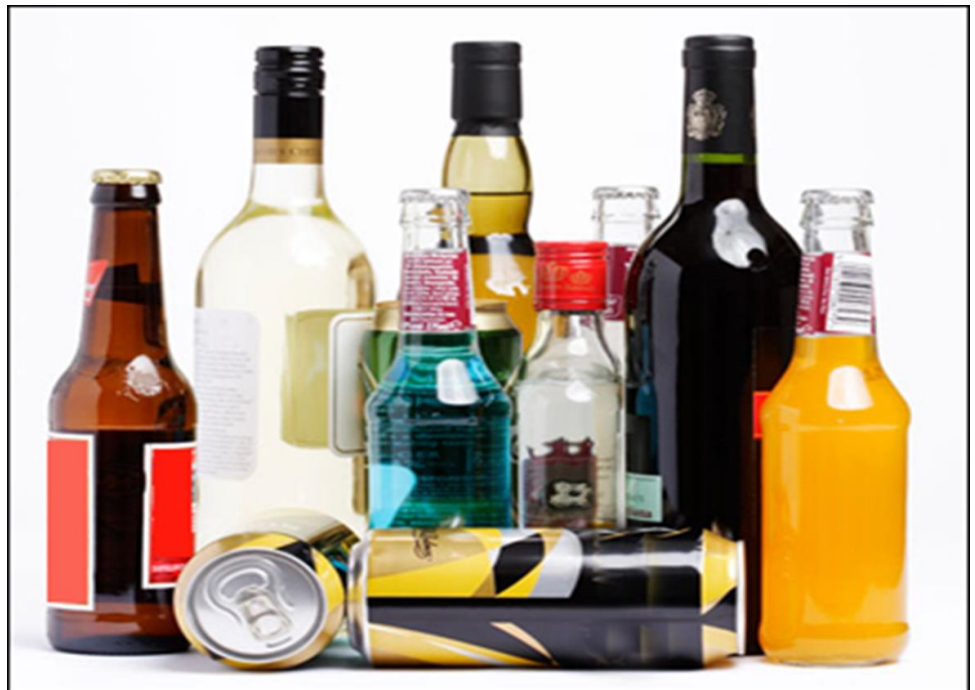



8 to 10 Dips a Day  
equals

30 to 40 Cigarettes  
a Day

# 2<sup>nd</sup> Hand smoking

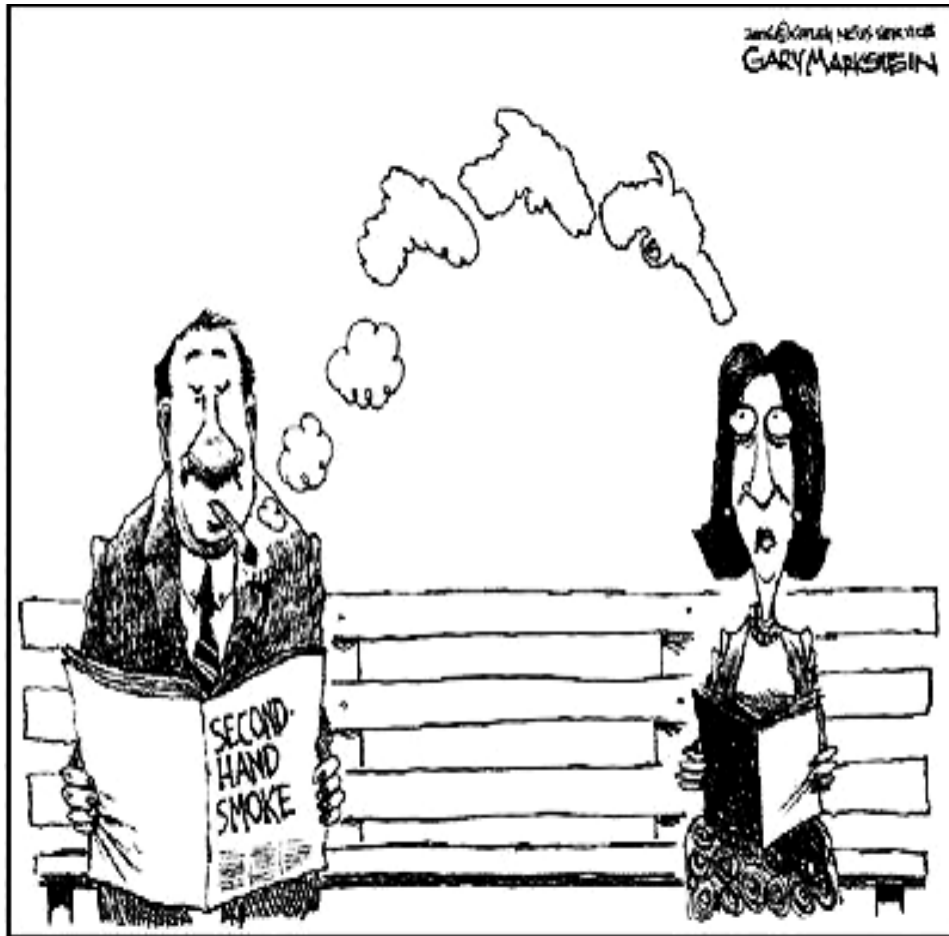

In nonsmokers, secondhand smoke causes

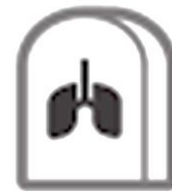

approximately

**7,300** lung cancer deaths per year

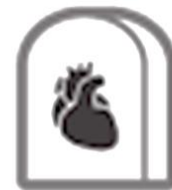

and nearly

**34,000** heart disease deaths per year

<http://www.cagle.com/politicalcartoons/PCcartoons/markstein.asp>

ONE PERSON  
**DIES**

**EVERY 6 SECONDS**  
FROM A TOBACCO-  
RELATED DISEASE.

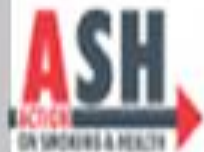

That's 10 people per minute.

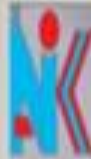

**TOBACCO = NICOTINE**

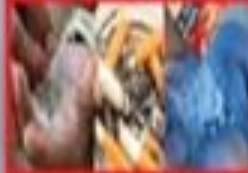

**NICOTINE = ADDICTION**

Tobacco is an agricultural product & 'Nicotine'  
is a drug found in tobacco which is highly  
addictive.

# Effects of nicotine

- Addictive
- Stimulates nervous system
- Constricts blood vessels
- Increase heart rate and blood pressure

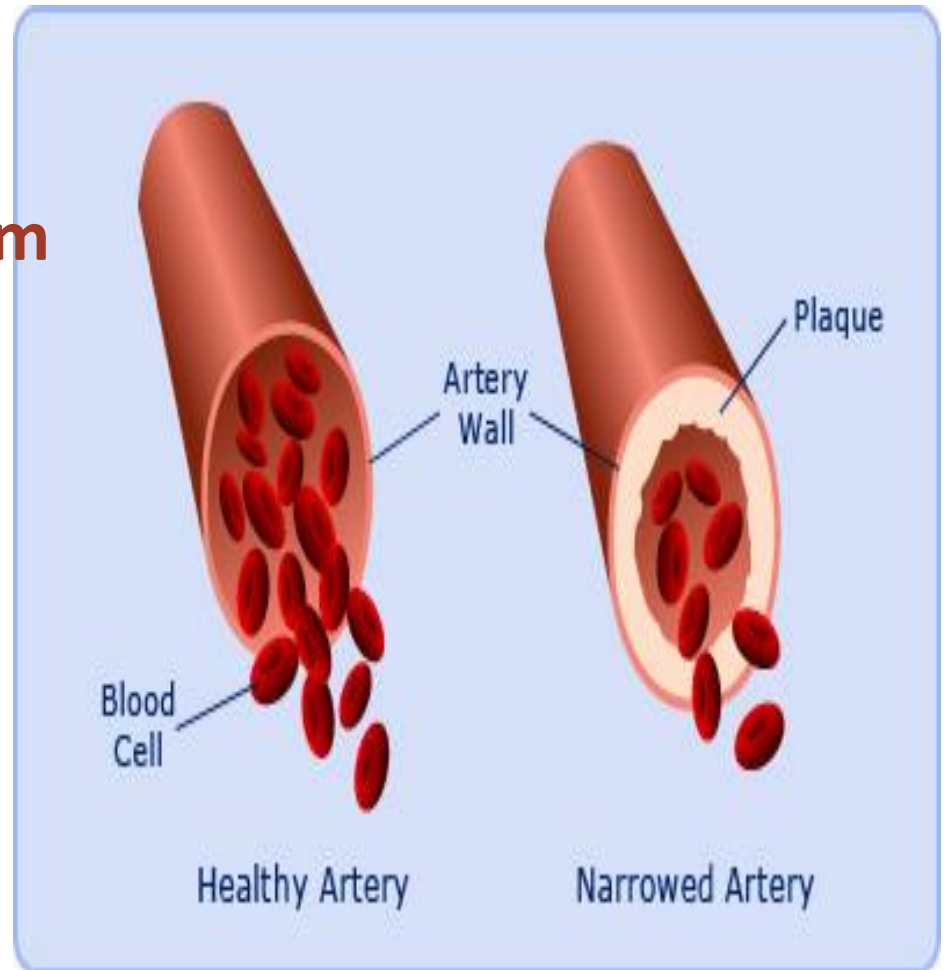

# HEART ATTACK

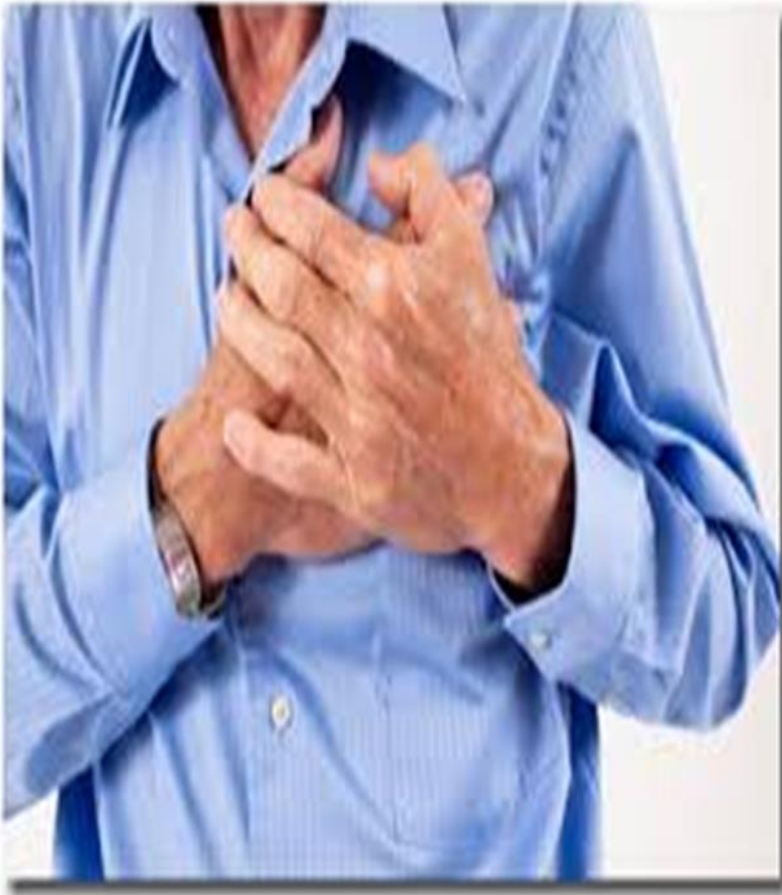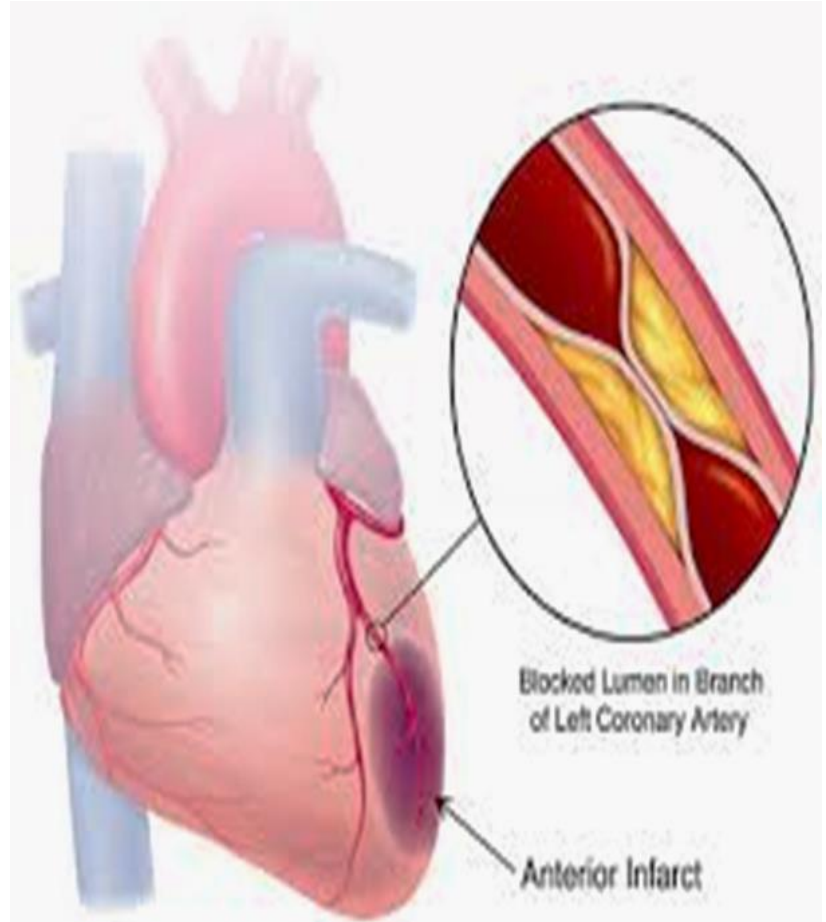

# Stroke

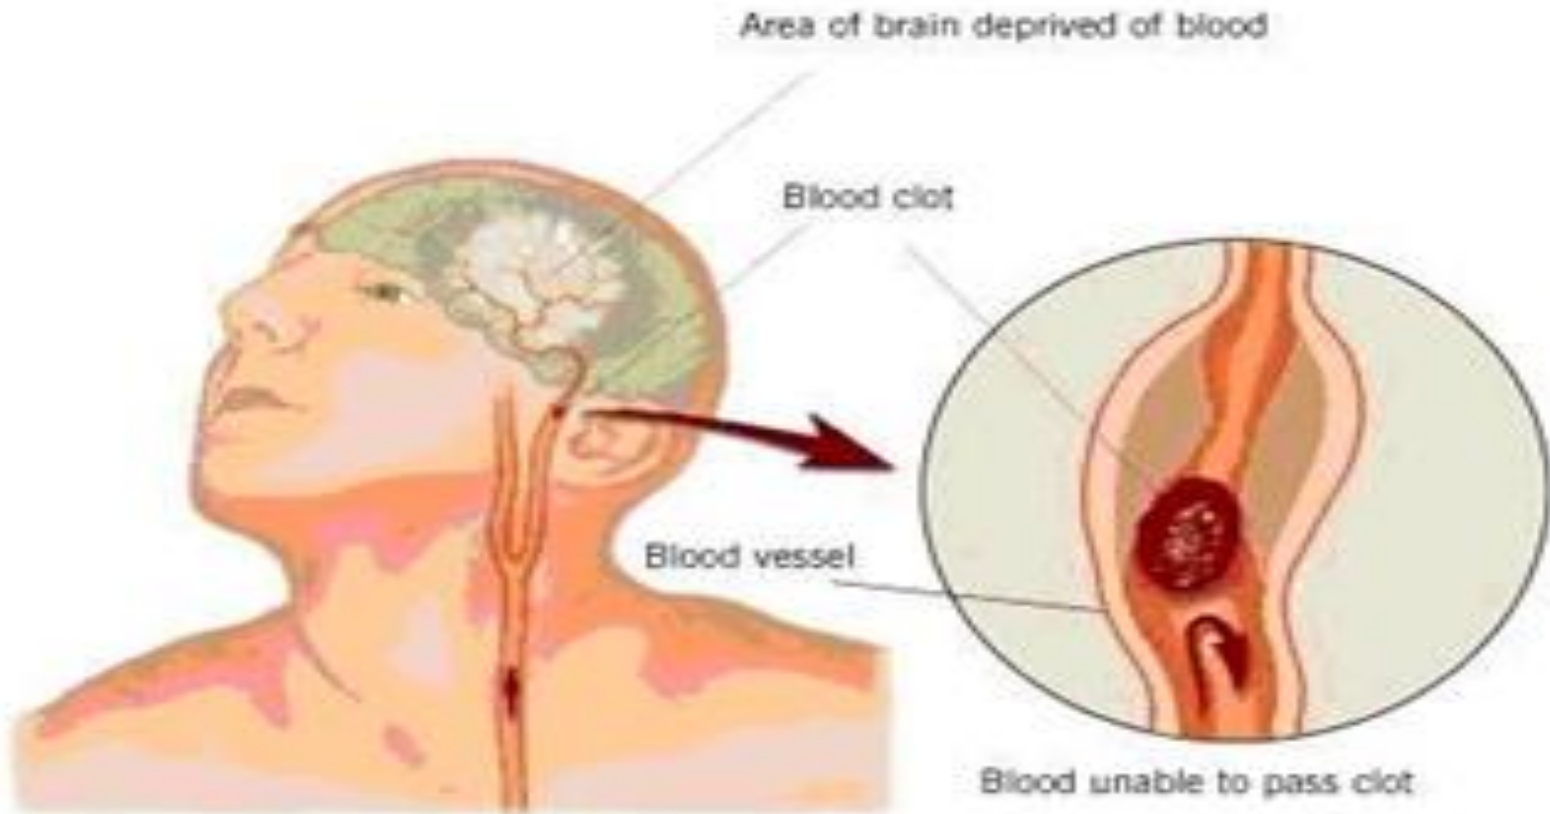

# Tar deposition in lung

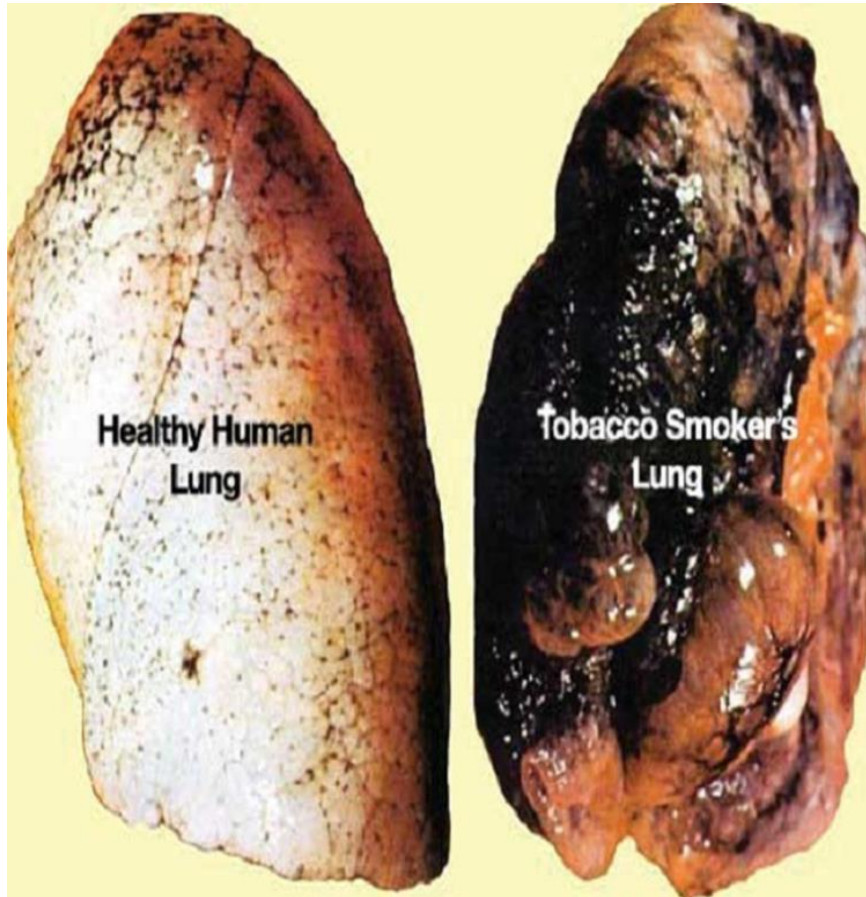

- **Smokers are 10 times more likely to get lung cancer and emphysema compared to non smokers.**



**Oral cancer**

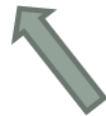

**Other Hazards  
of Tobacco**

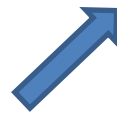

**Respiratory problems**

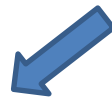

**Dental caries**

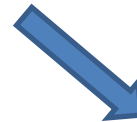

**Cataract**

# HOW TO Quit

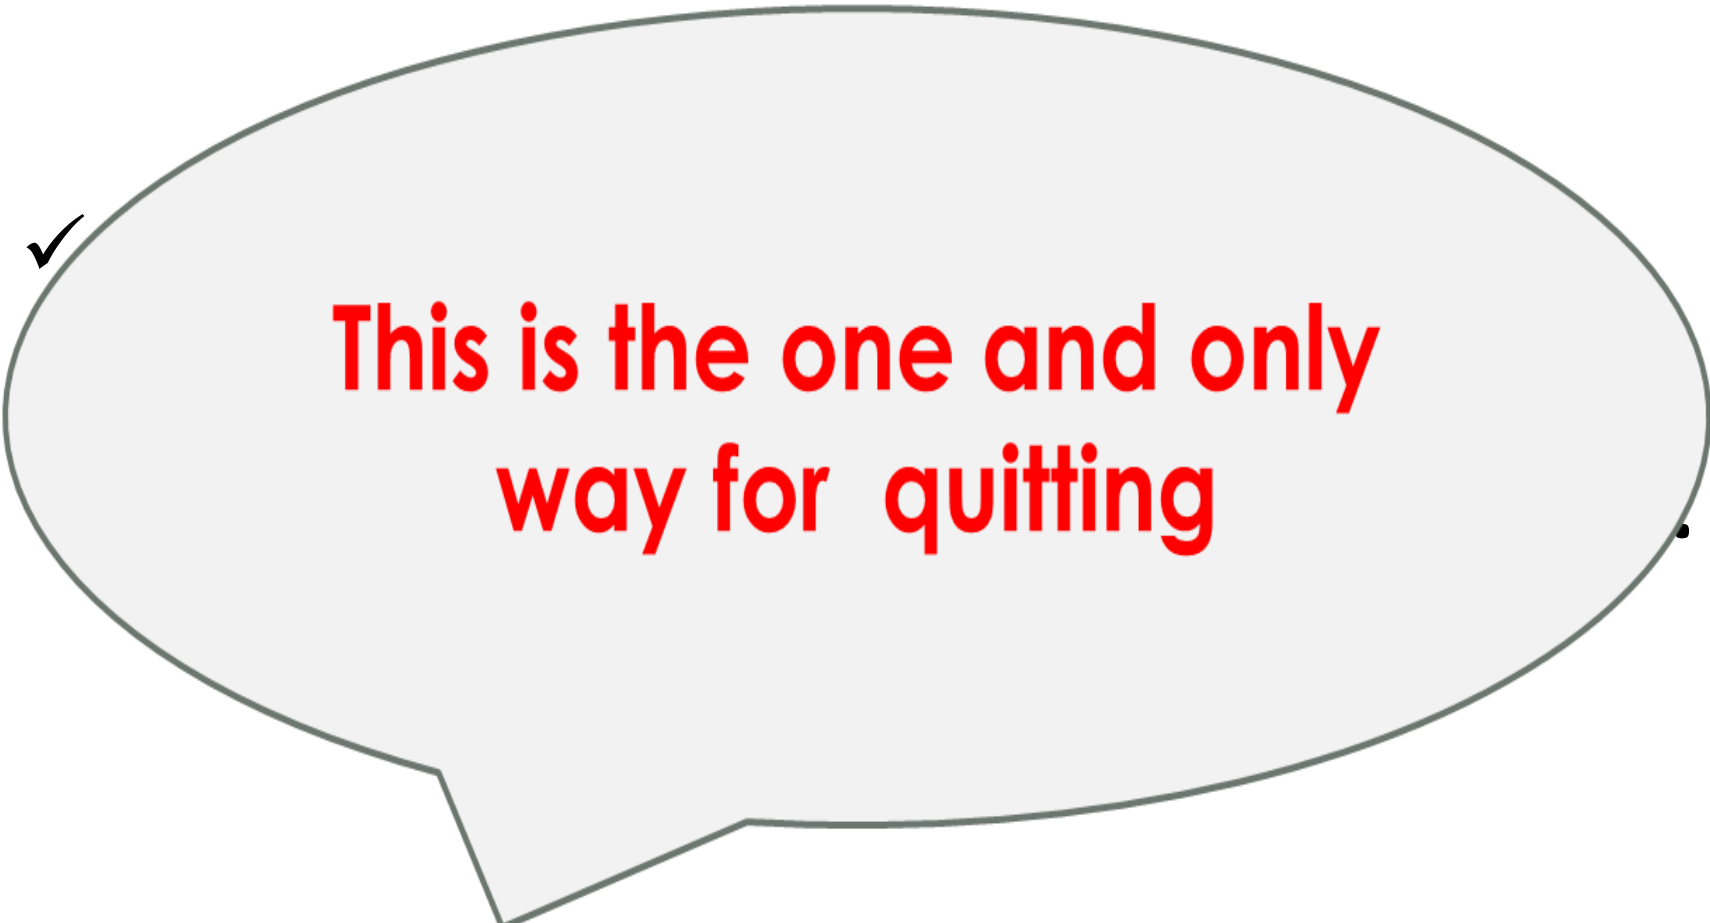

**This is the one and only  
way for quitting**

# Alcohol abuse

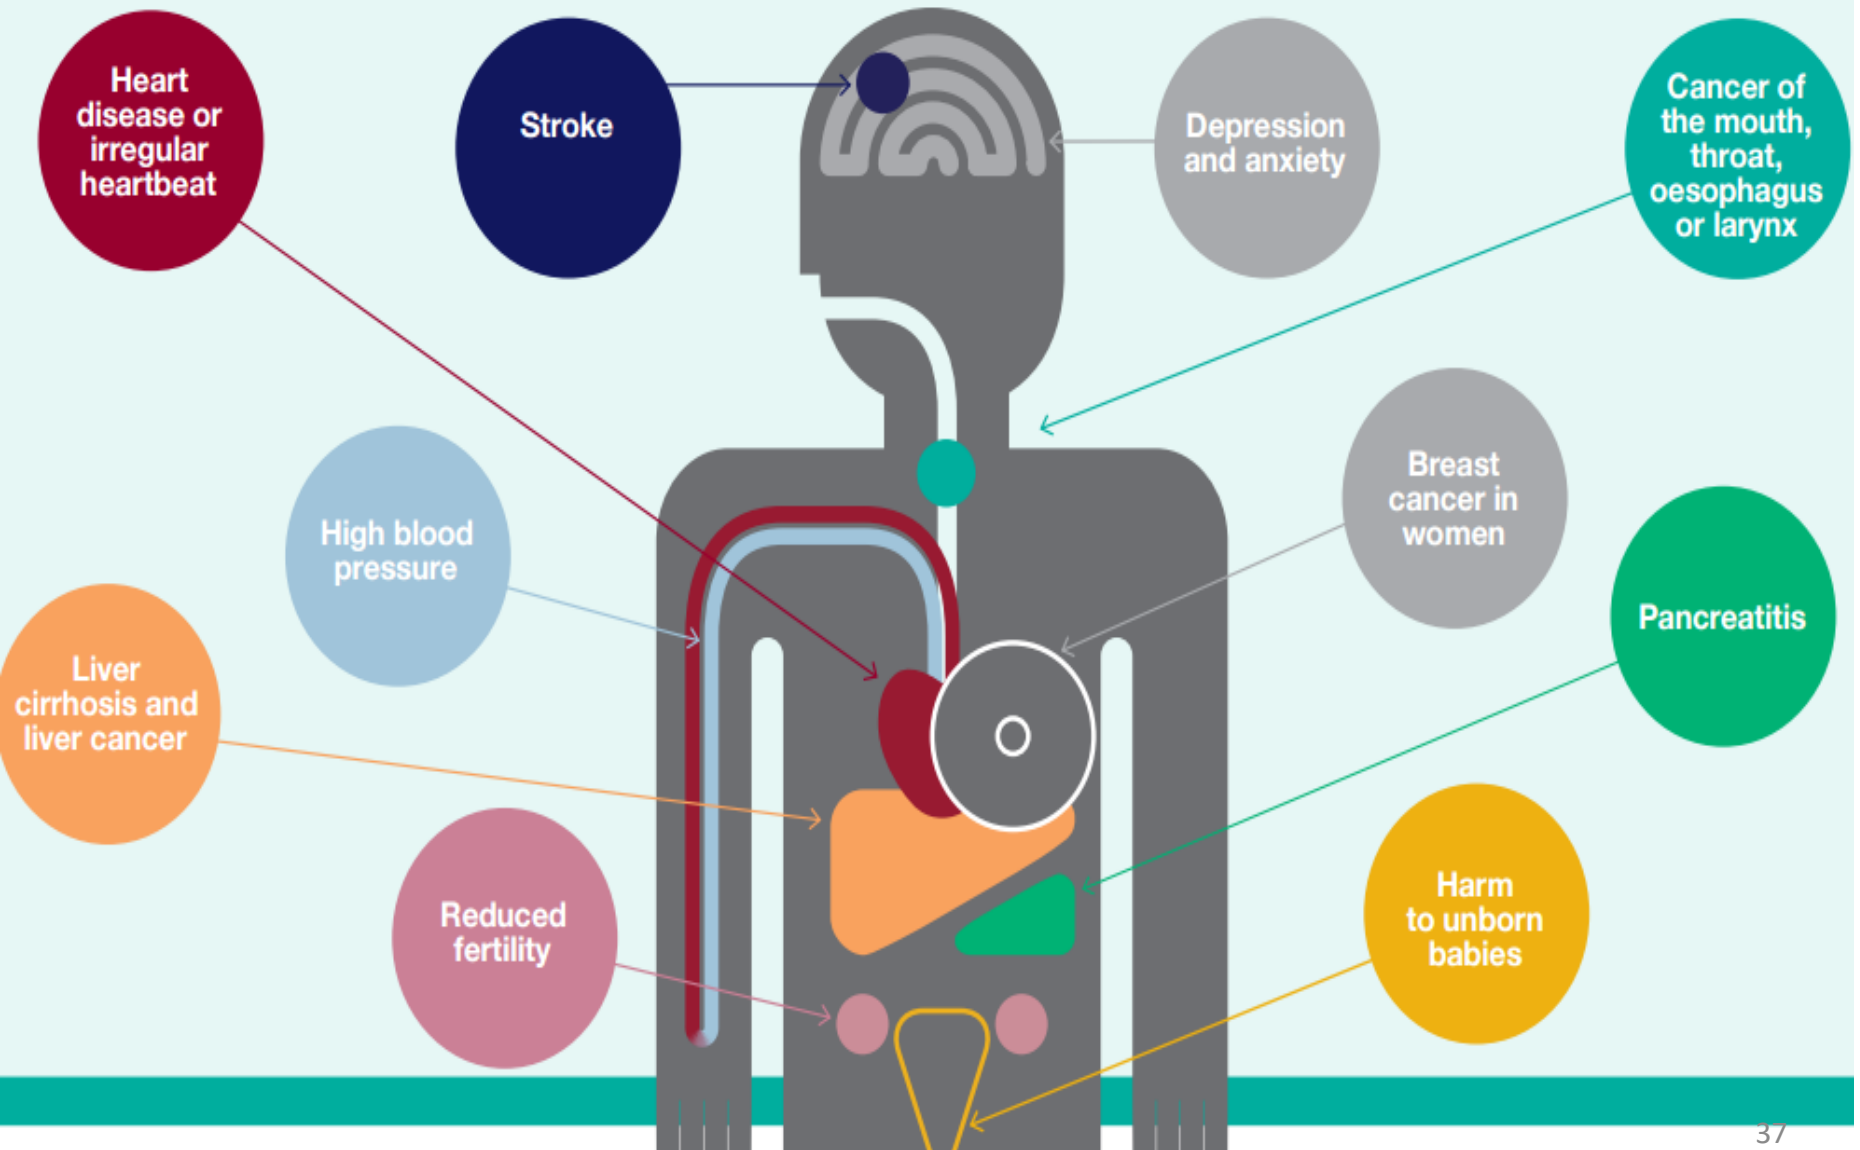

# What is moderate drinking?

- **3-4 standard drinks** per drinking episode, no more than 9 drinks per week for women and 12-14 for men. Also, moderate drinking means limiting **how fast you drink**
- A standard drink is equal to-
  - ✓ 355 ml. beer with 5% alcohol
  - ✓ 150 ml. glass of wine (12.5% alcohol).
  - ✓ 45 ml. of 80 proof liquor (40% alcohol)

# If you're thinking about moderate drinking for yourself!

- If you've had significant alcohol-related problems and **are currently not drinking**, trying moderate drinking may put you at risk again for alcohol-related problems.
- If you're currently drinking more than the guidelines of moderation, you will reduce your risk for problems by cutting back.

# ***HYPERTENSION***

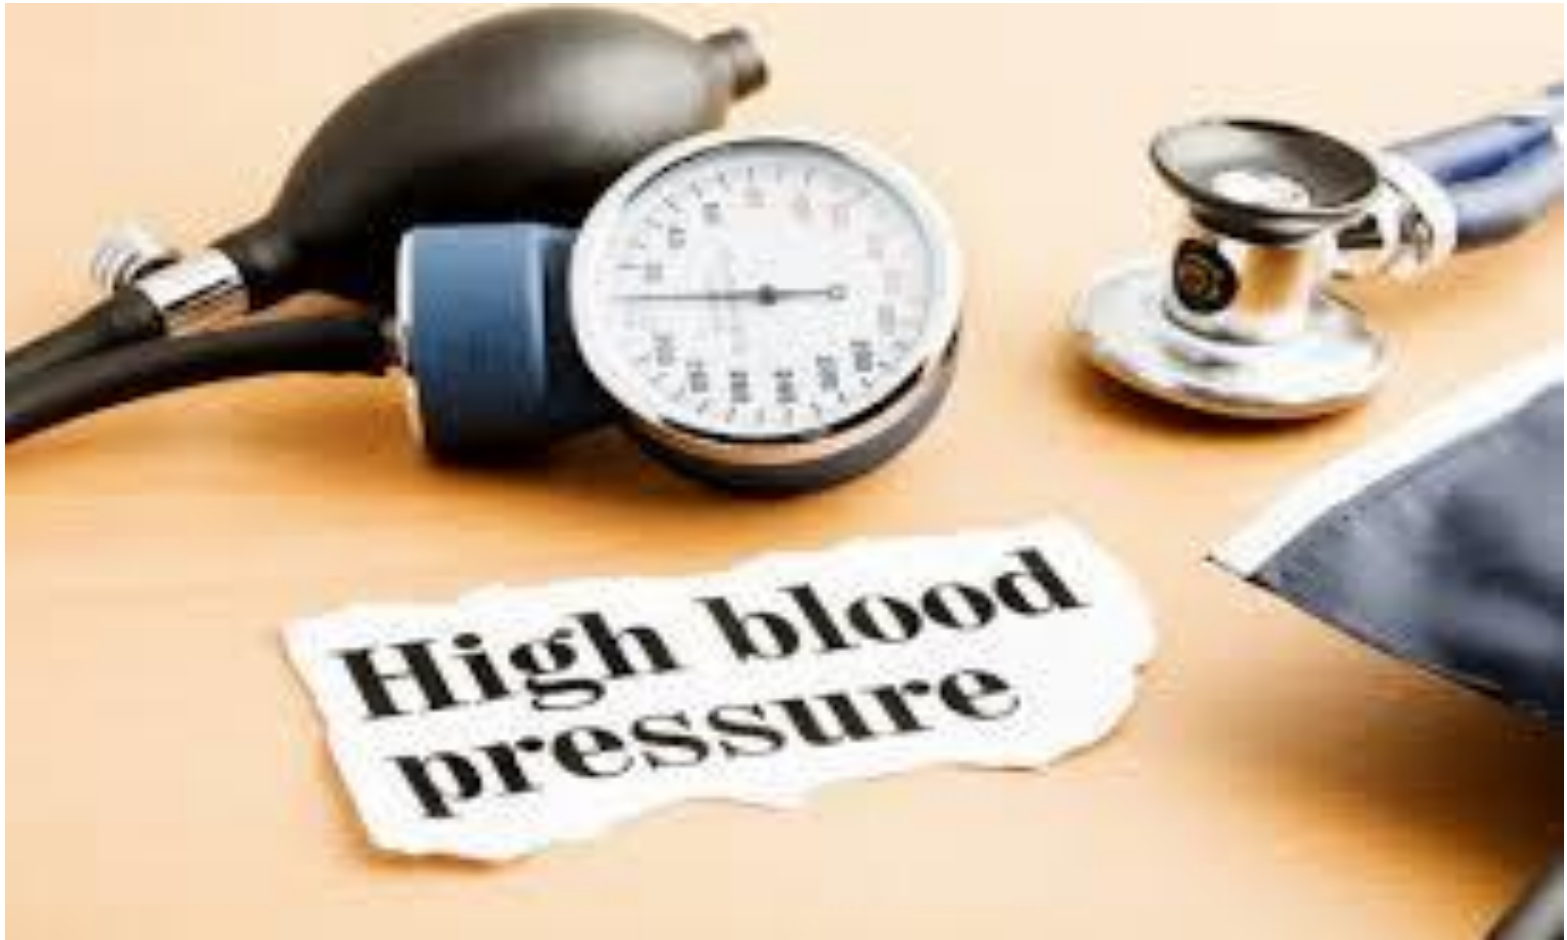

High

Systolic 140 or above OR  
Diastolic 90 or above

Pre-High

Systolic between 121-139 OR  
Diastolic between 81-89

Normal

Systolic 120 or less AND  
Diastolic 80 or less

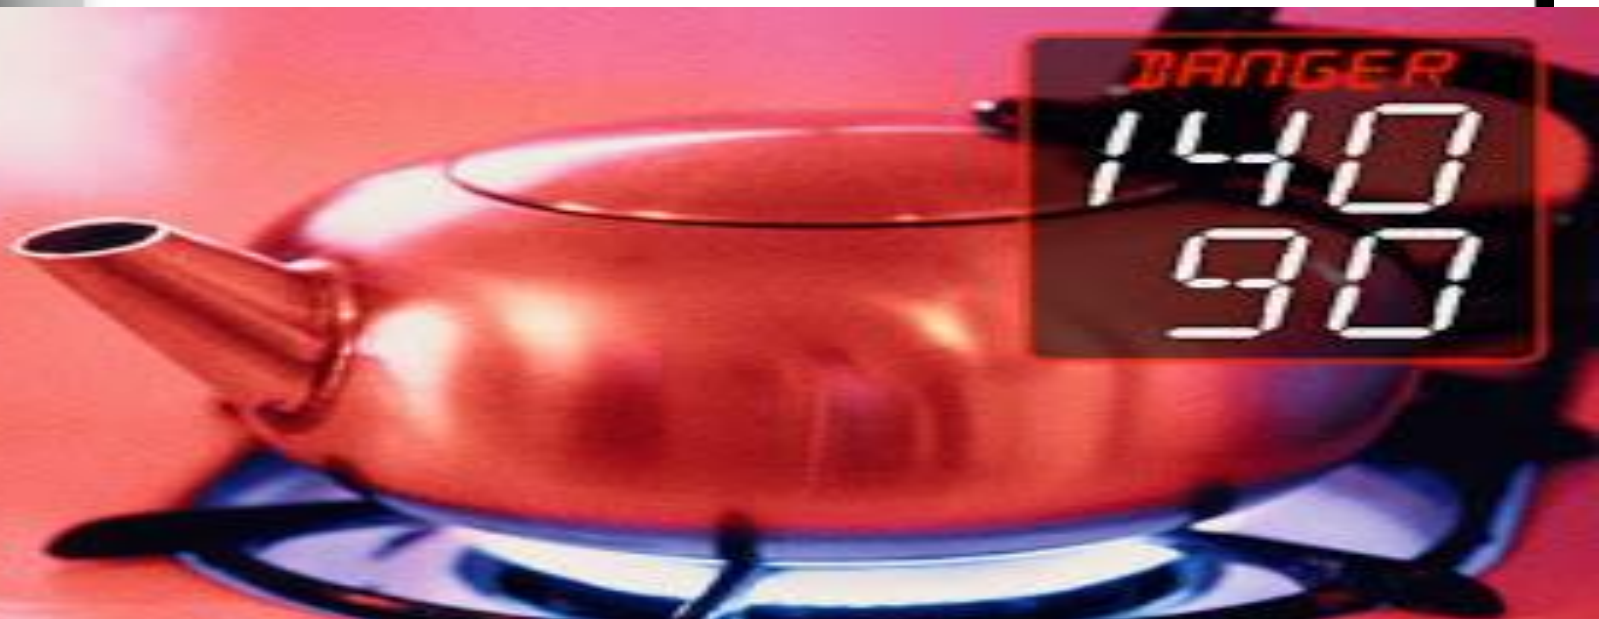

# ***RISK FACTORS***

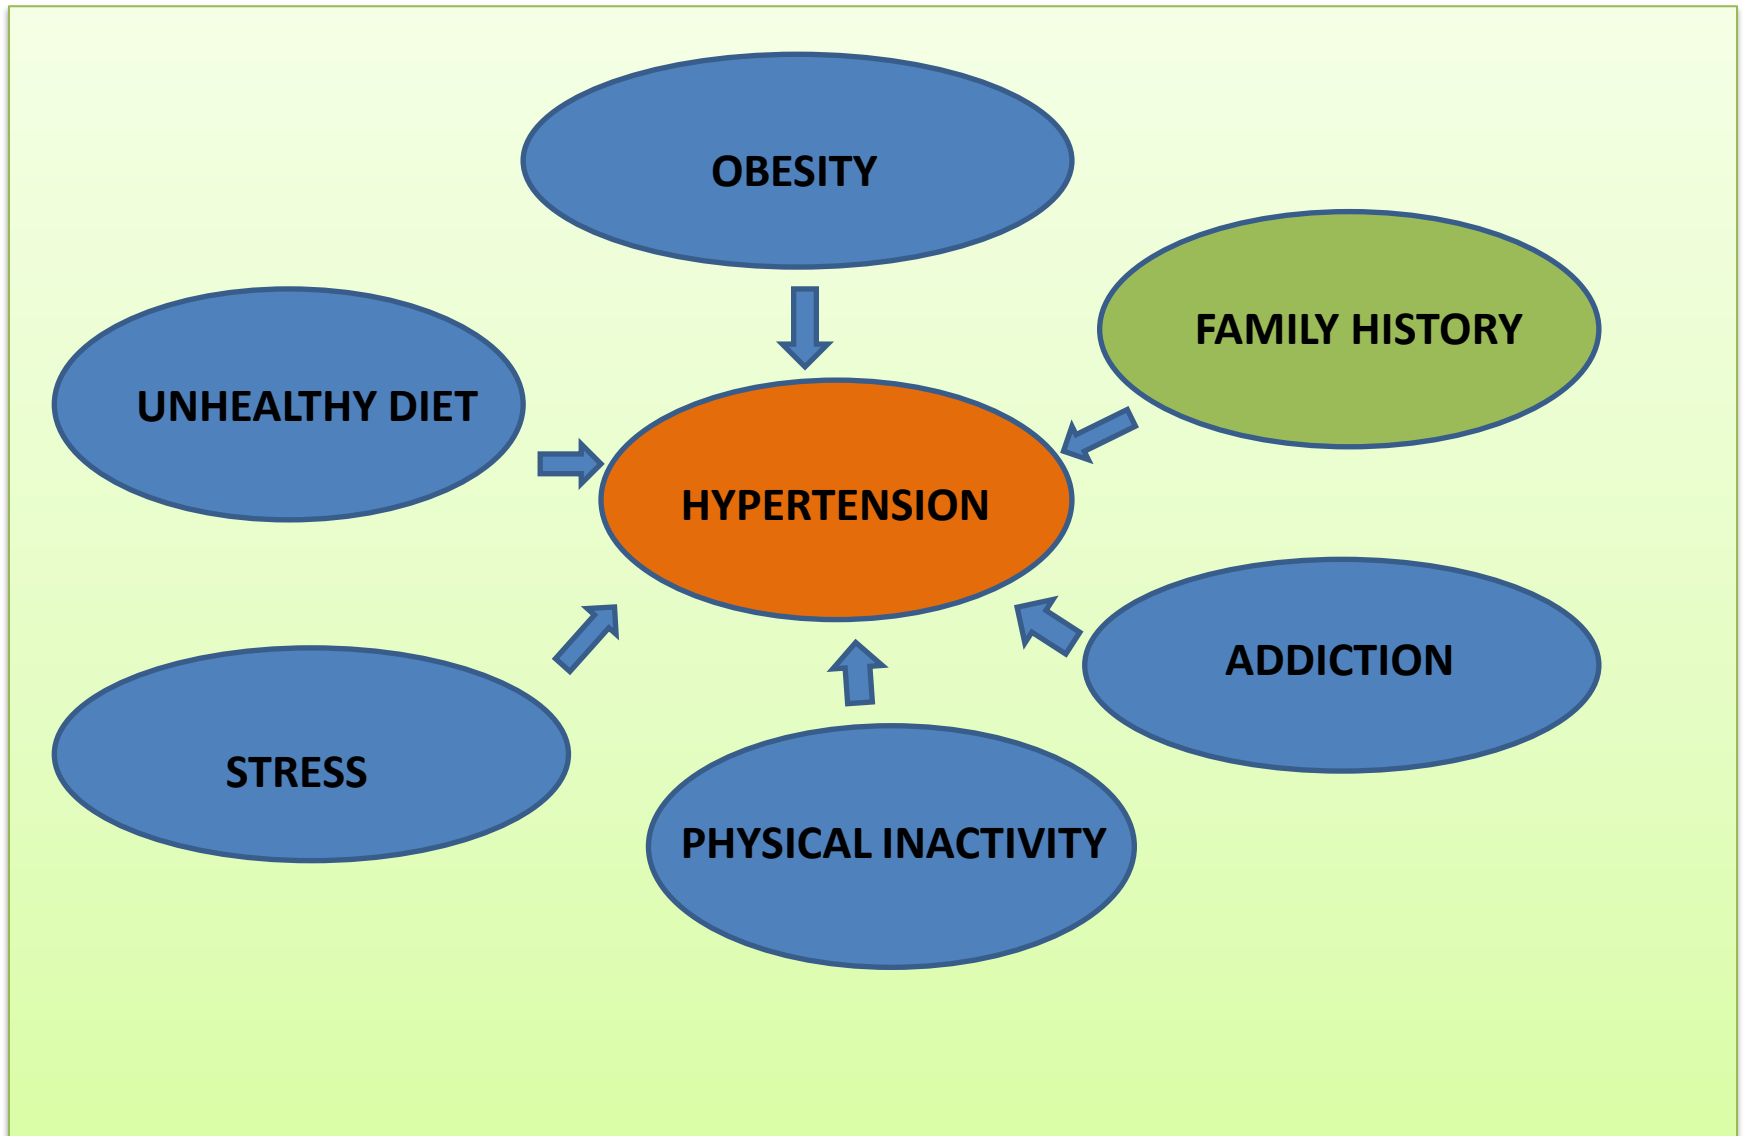



# Hypertension self care

- Self monitoring
- Compliance to antihypertensive drug

**“If I start taking drugs I have to take life long!”**

- It is better to start drugs to control BP rather than let hypertension damage your other organs like heart and kidney permanently.
- There is always chance of stopping the drug **(on doctor’s advice)** if your BP is lowered.

STAY SUPER

HALT THE RISE

**BEAT DIABETES**

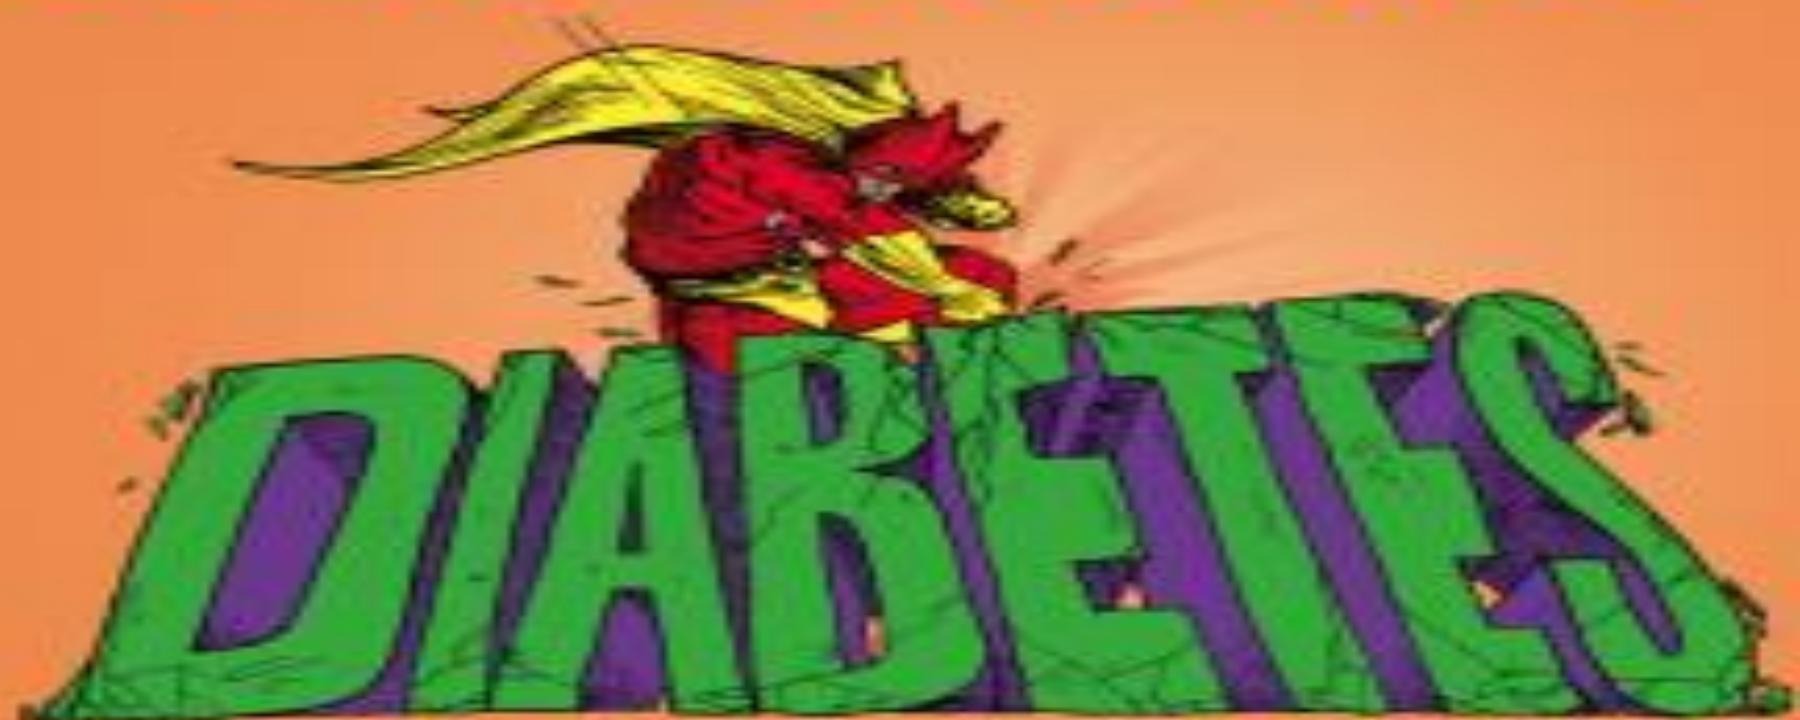

**WORLD HEALTH DAY 2016**

#diabetes | [www.who.int/worlddiabetes](http://www.who.int/worlddiabetes)

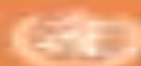

World Health  
Organization

# Diabetes is a huge and growing problem...

 / 12  
people with  
**DIABETES**

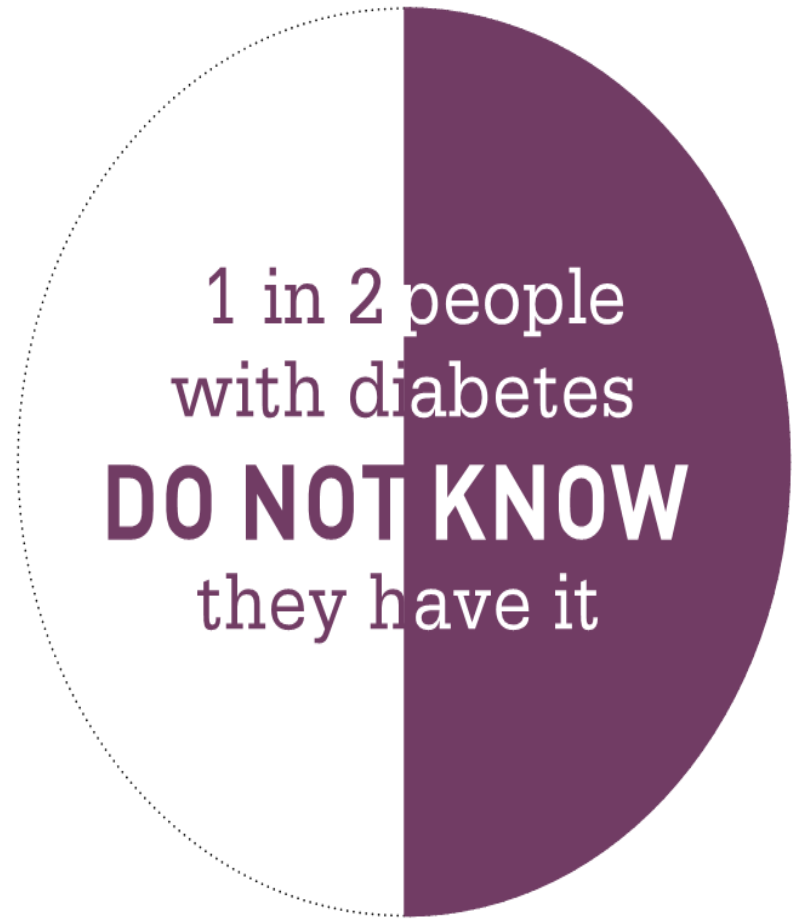

# DIABETES RISK FACTORS

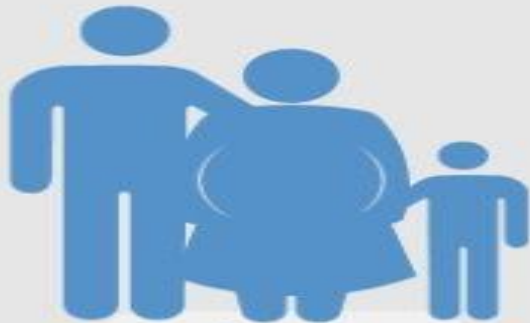

family  
history

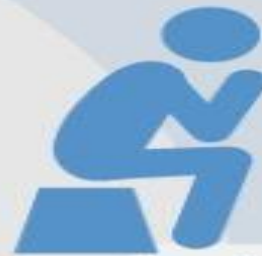

lack of  
exercise

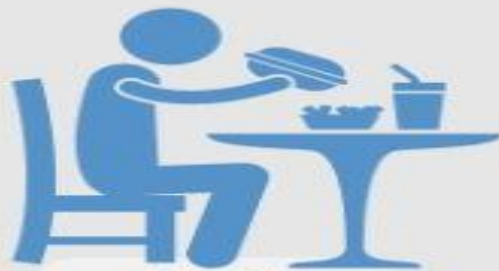

unhealthy  
eating

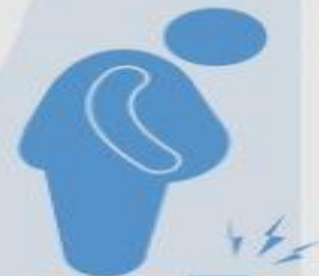

overweight

# Warning Signs

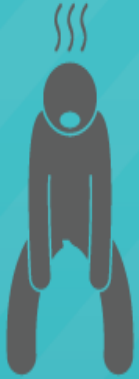

Tiredness

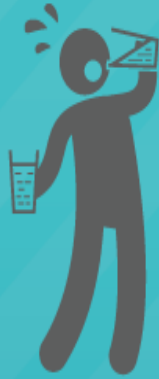

Excessive thirst

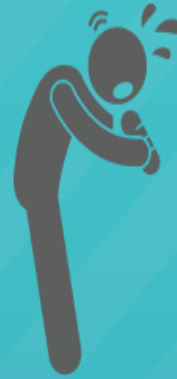

Increased hunger

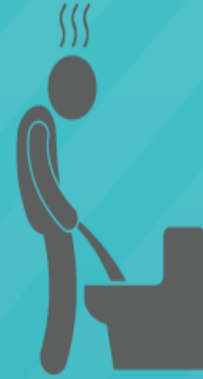

Frequent urination

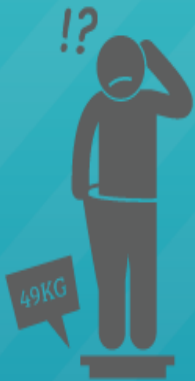

Unexplained weight loss

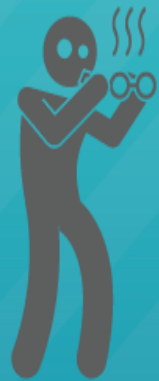

Blurred vision

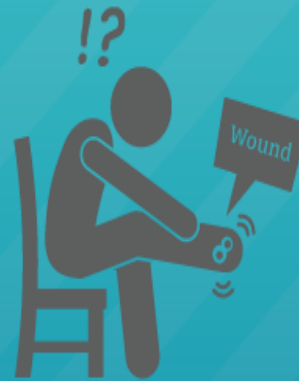

Slow wound healing

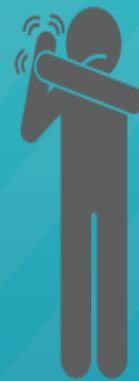

Tingling in the hands & feet

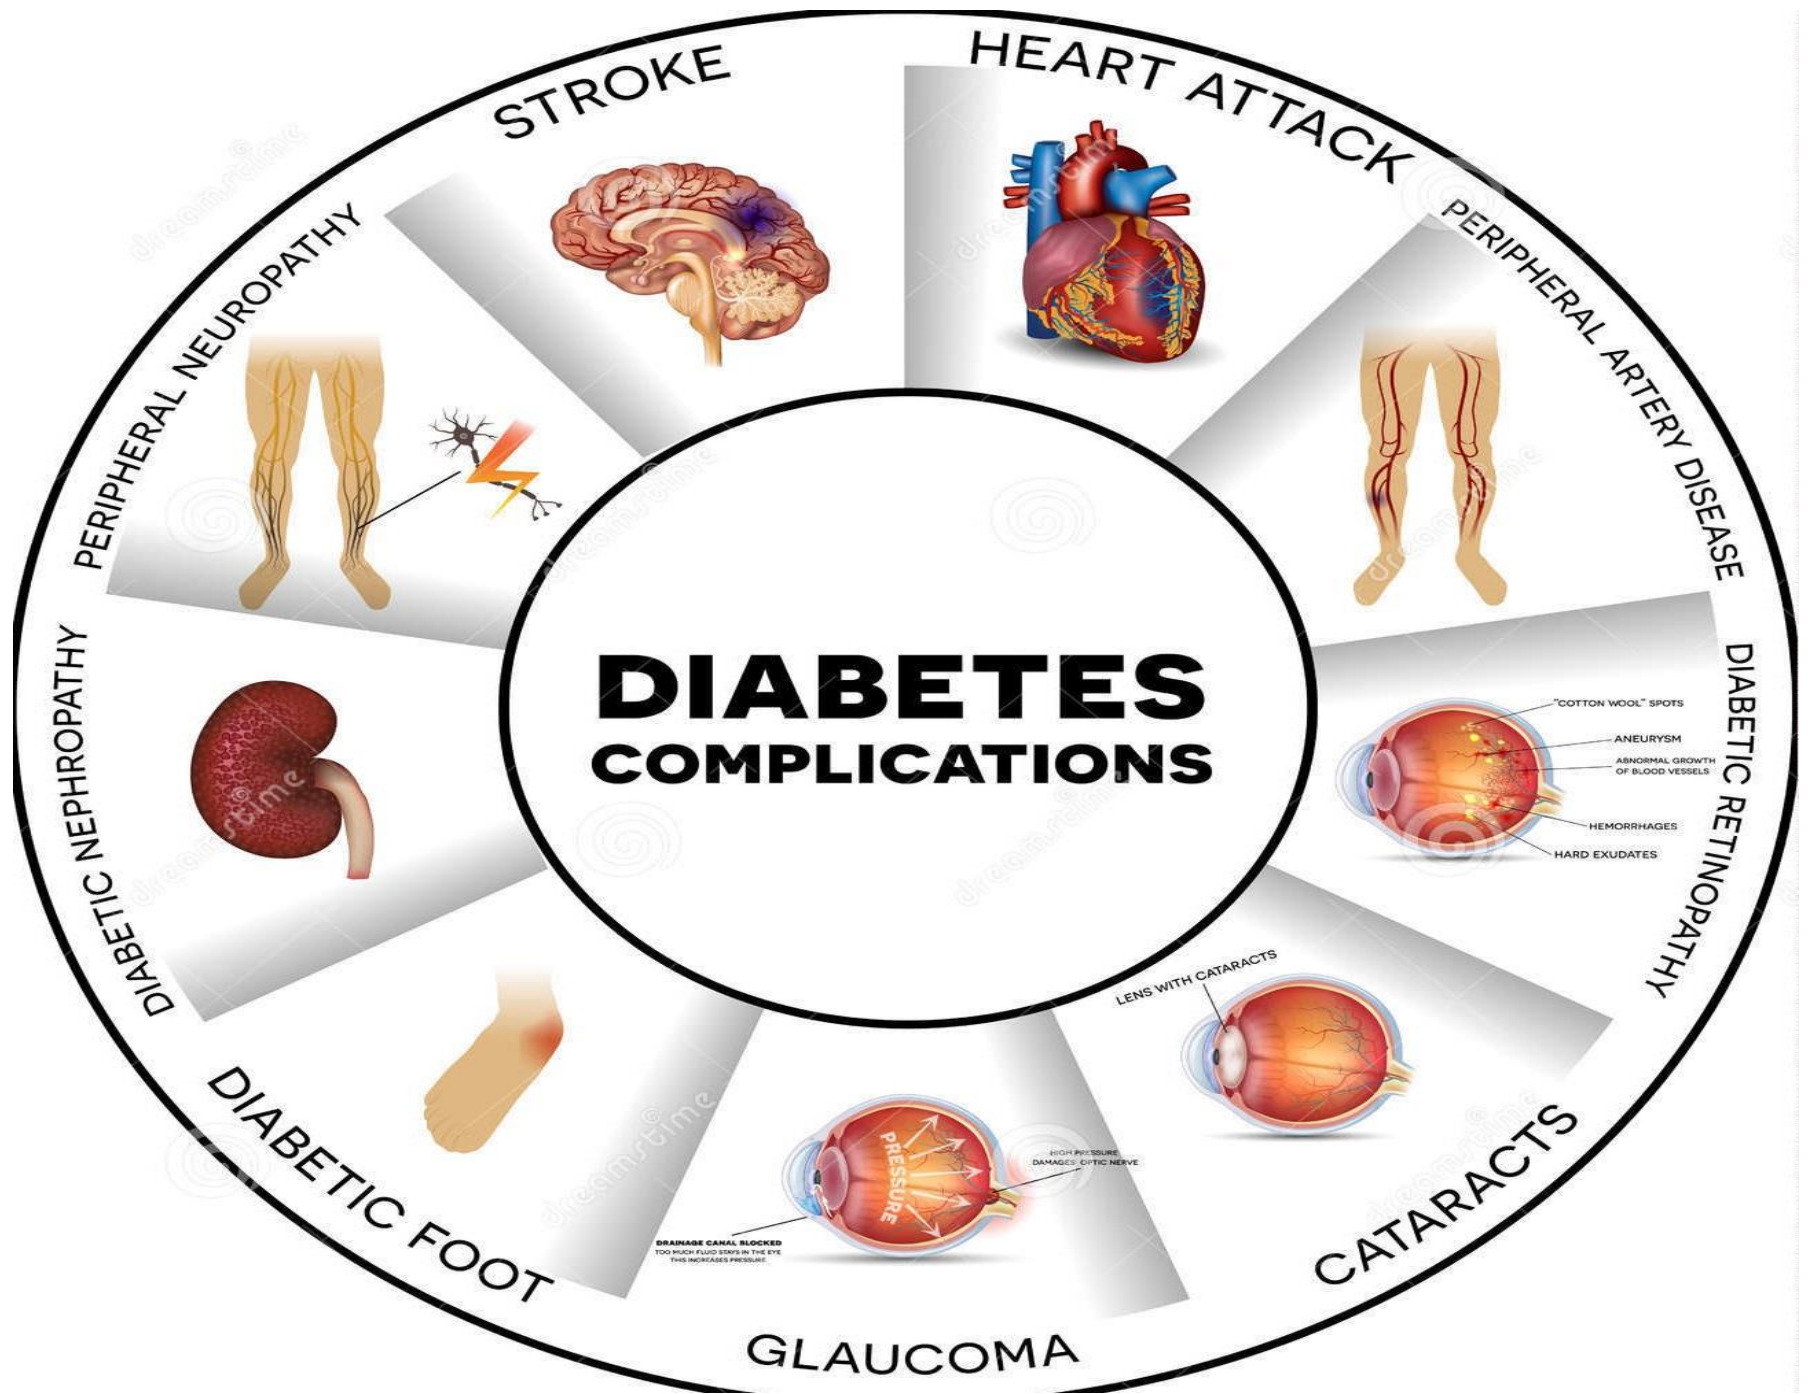

## American Diabetes Association, 2011 Diagnostic criteria for Diabetes Mellitus

|                                                     | Normal Glucose tolerance | Impaired Glucose Tolerance<br>'PREDIABETES' | <b>Diabetes Mellitus</b>      |
|-----------------------------------------------------|--------------------------|---------------------------------------------|-------------------------------|
| <b>Fasting plasma glucose</b>                       | <100mg/dl                | 100-125mg/dl                                | <b><i>&gt;/=126mg/dl</i></b>  |
| <b>2 hr plasma glucose during an OGTT**</b>         | <140mg/dl                | 140-199mg/dl                                | <b><i>&gt;/=200mg/dl</i></b>  |
| <b>Random Blood glucose + Symptoms of diabetes*</b> |                          |                                             | <b><i>&gt;/= 200mg/dl</i></b> |
| <b>A1C</b>                                          | <5.6%                    | 5.7-6.4%                                    | <b><i>&gt;/= 6.5%</i></b>     |

\*polyuria, polydipsia, weight loss

\*\*after a glucose load of 75g anhydrous glucose dissolved in water

**YOU can control diabetes  
with a healthy lifestyle,  
proper nutrition  
and support.**

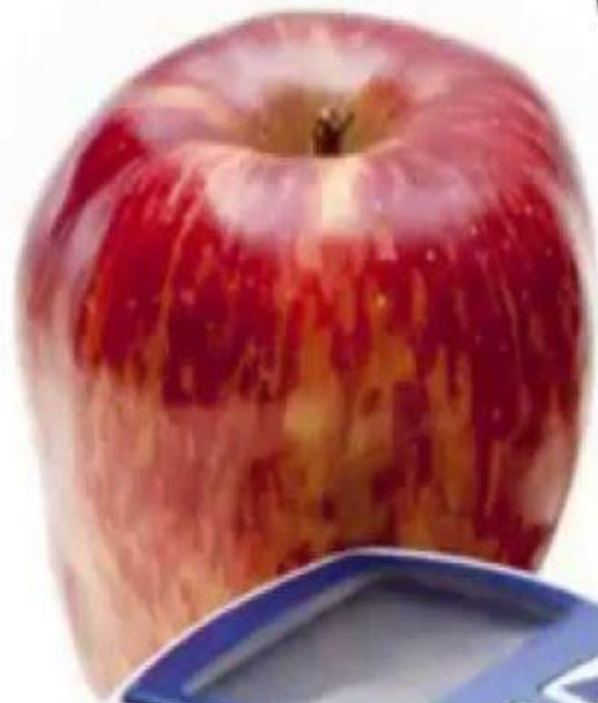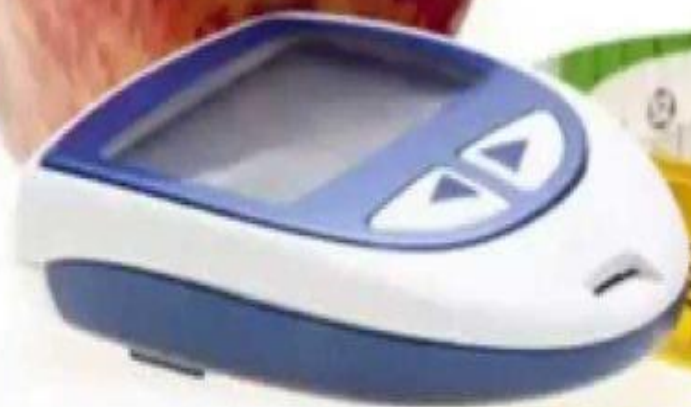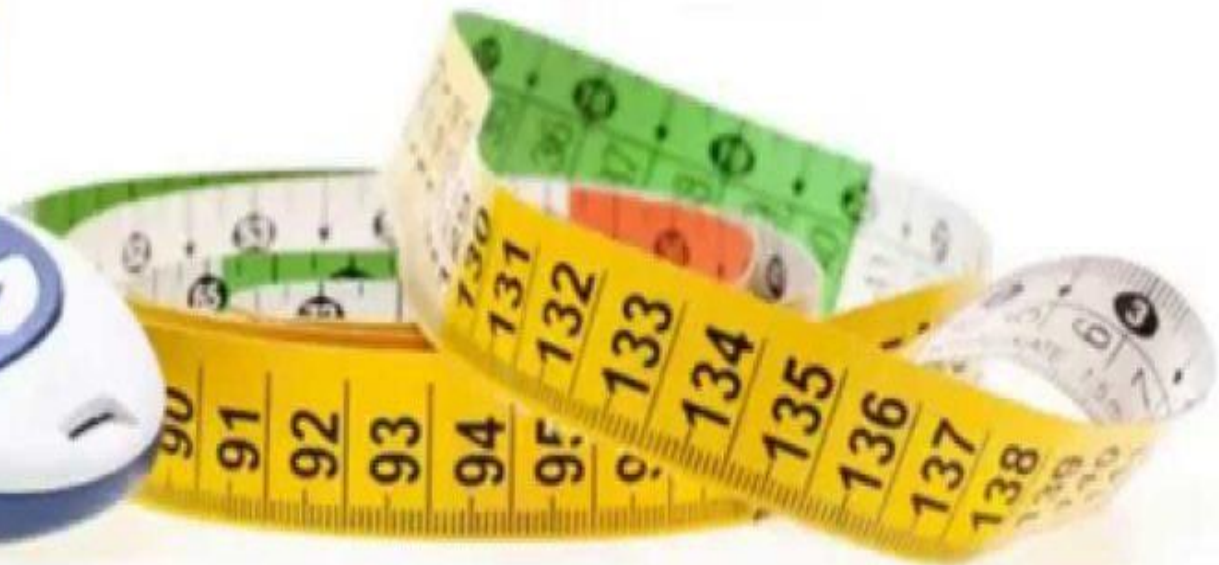



# Diabetes Self-care

- Diet
- Physical activity
- Blood sugar monitoring
- Taking drugs regularly
- Foot care
- Eye care

# Self care

Thoroughly inspect  
your feet daily, and  
keep them clean  
and dry

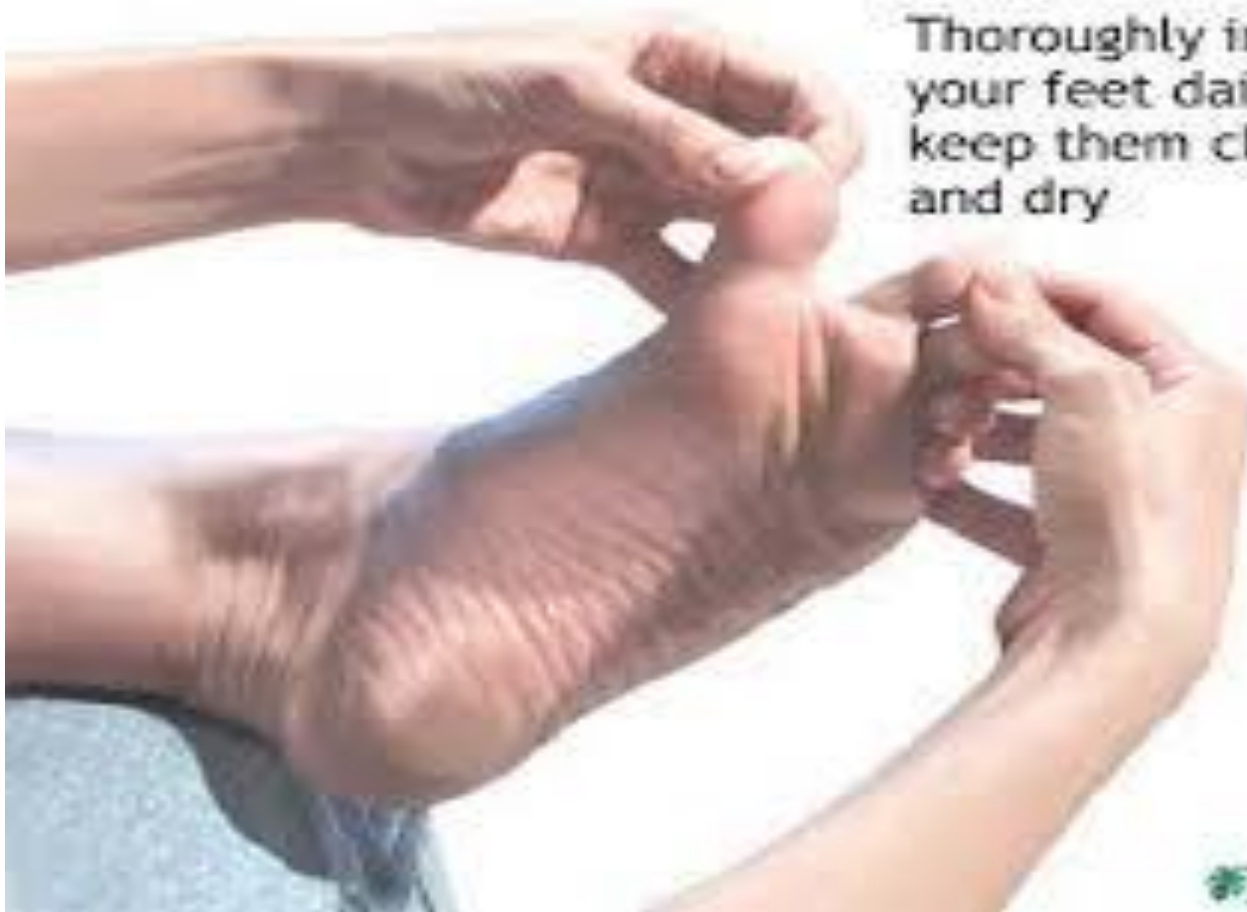

A close-up photograph of a person's midsection. The person is wearing a light blue, long-sleeved shirt. A yellow measuring tape is wrapped around their waist, held in place by their right hand. The tape measure shows markings in inches and centimeters. The background is a plain, light-colored wall.

**OBESITY**

# BMI(Body Mass Index)

Calculate Your

$$\text{BMI} = \frac{\text{Weight (kg)}}{\text{Height x Height (metre)}}$$

## BMI Chart

BMI less than 18.50

Underweight

BMI 18.50 - 24.99

Healthy weight

BMI 25.00 - 29.99

Overweight

BMI 30 or more

Obese

## WHO Classification

## Associated risks

BMI between 18.5 and 25 : normal weight

Normal

BMI between 25 and 30 : overweight

Average

BMI between 30 and 40 : obesity

Important

BMI above 40 : morbid obesity

Severe

# Central Obesity

- Waist circumference (WC) recommendation:
  - ✓ Less than 90 cm for men
  - ✓ Less than 80 cm for women
- Even if your BMI is normal, if your WC is high, you are at risk.

# Dyslipidemia/ High blood cholesterol

| Lipid profile          | Desirable range |
|------------------------|-----------------|
| Total cholesterol      | <200 mg/dl      |
| Triglyceride           | <150 mg/dl      |
| LDL (bad cholesterol)  | <100 mg/dl      |
| HDL (good cholesterol) | >50 mg/dl       |

# Stress

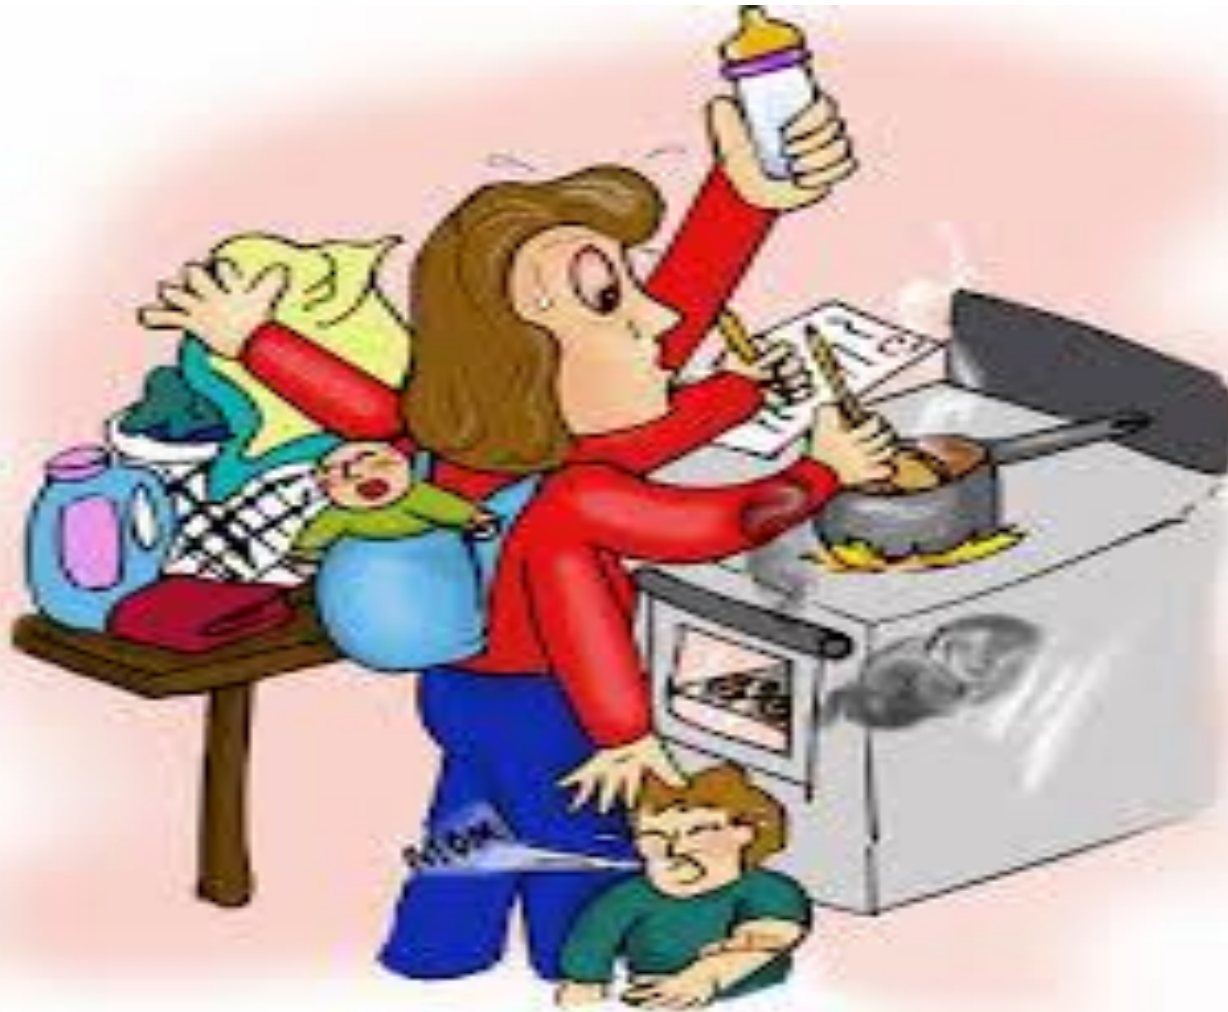

# World Health Day: 7<sup>th</sup> April

## WHO Theme 2017

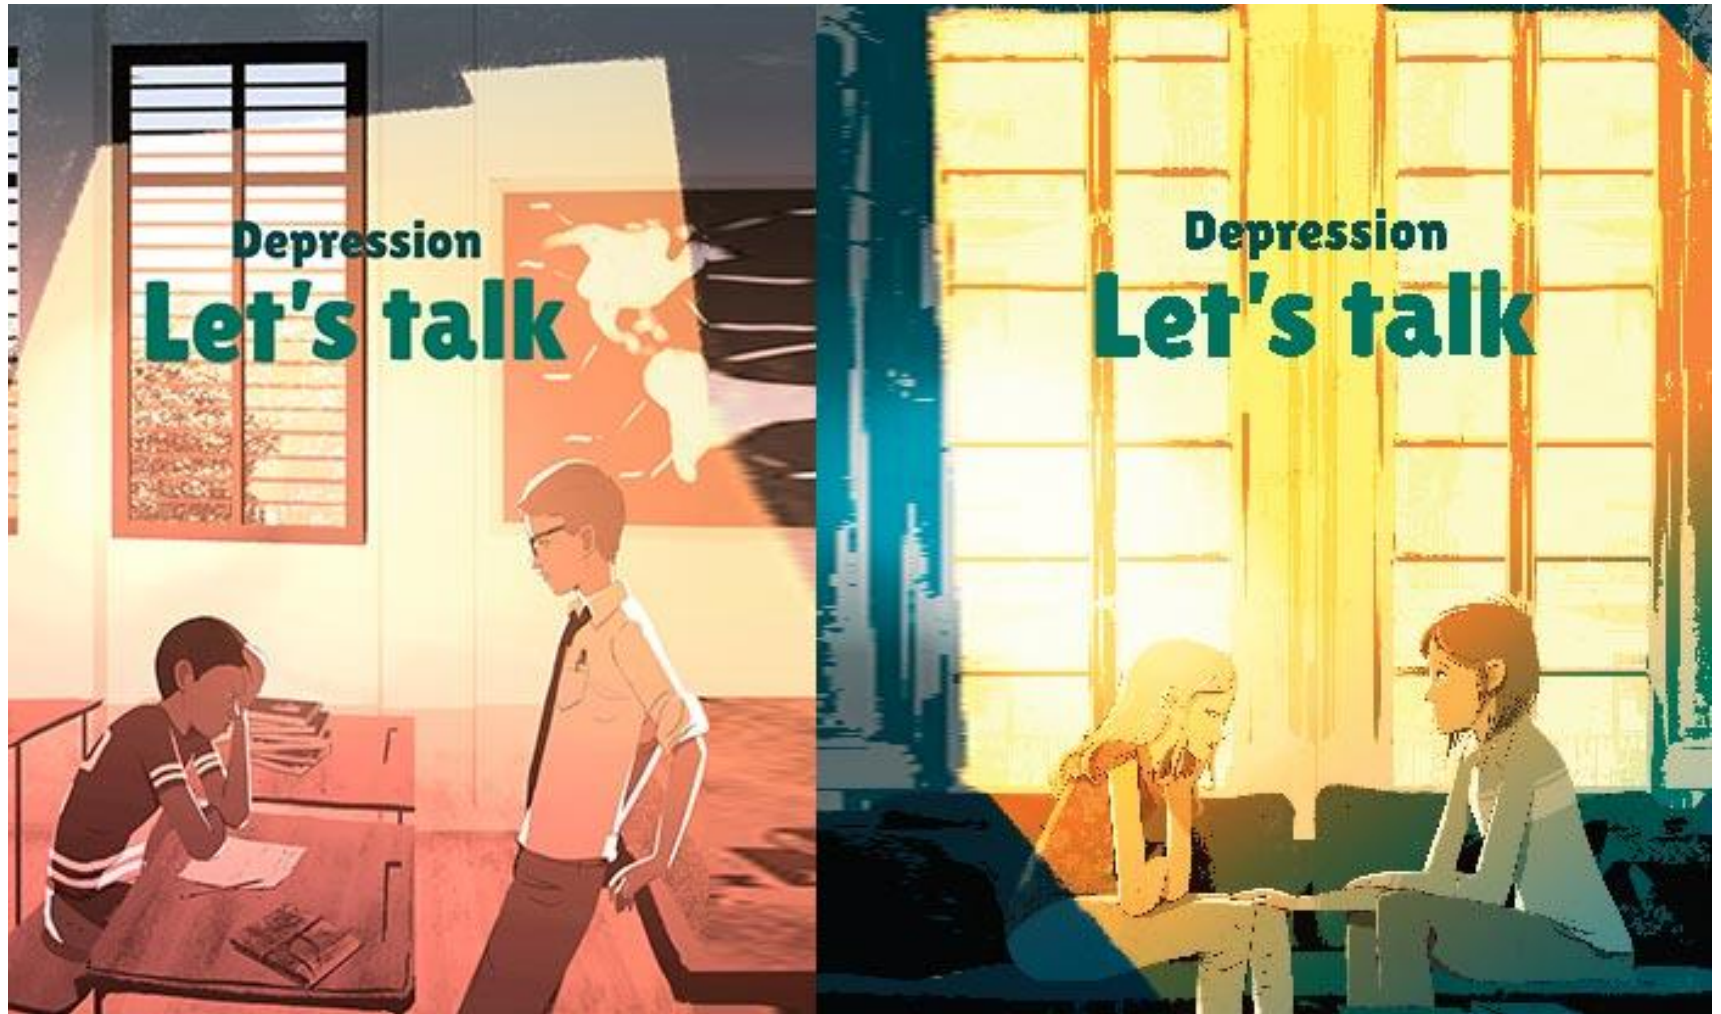



# Tips on Managing Stress

- Positive Attitude
- Support System
- Exercise
- Laughing
- Taking Time for You
- Meditation

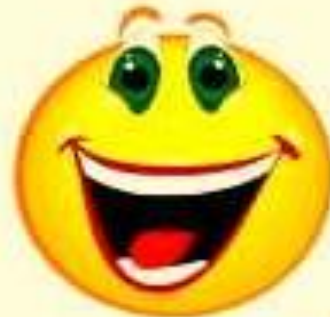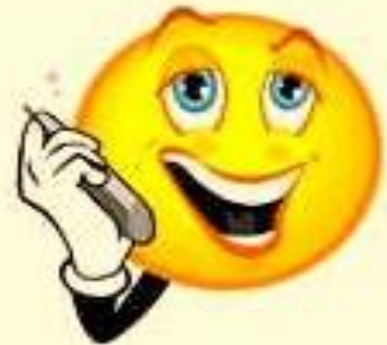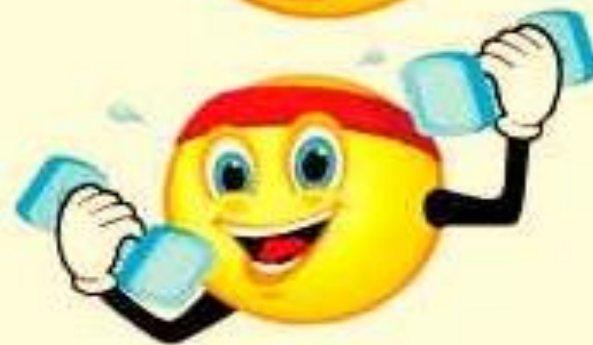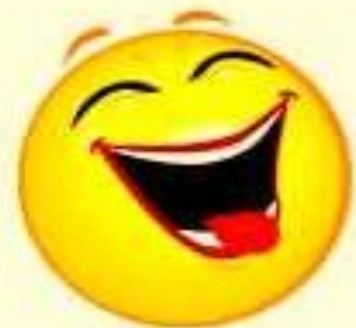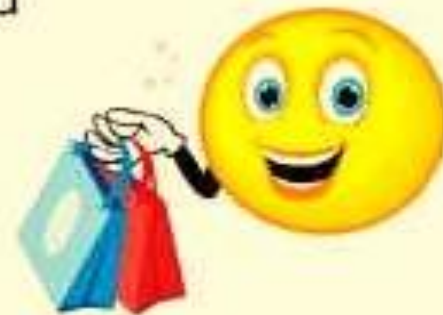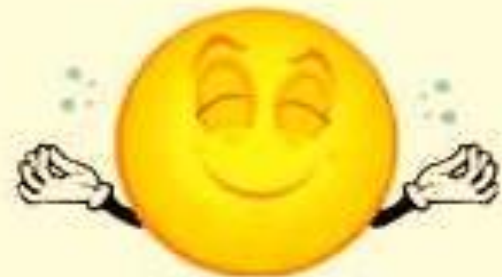

# BENEFITS OF YOGA

**INCREASES**

**FEELING OF WELLNESS**  
**POSITIVE ATTITUDE**  
**CONCENTRATION**  
**FLEXIBILITY**  
**ENERGY**  
**SOCIAL SKILLS**

**ANXIETY/ STRESS**  
**DEPRESSION**  
**SUGAR &  
CHOLESTEROL**  
**WEIGHT**  
**BLOOD PRESSURE**  
**ARTHRITIS /  
MUSCLE PAIN**

**DECREASES**

A close-up photograph of a bright green tree frog lying on its back on a large, green lily pad. The frog's front legs are tucked up towards its chest, and its hind legs are also tucked up towards its belly. The frog's eyes are large and dark, and it has a calm, relaxed expression. The background is a soft, out-of-focus green, suggesting a natural, moist environment. The overall mood is peaceful and serene.

**Relax.**

[www.facebook.com/montereybayholistic](http://www.facebook.com/montereybayholistic)

**It's a healthy choice!**

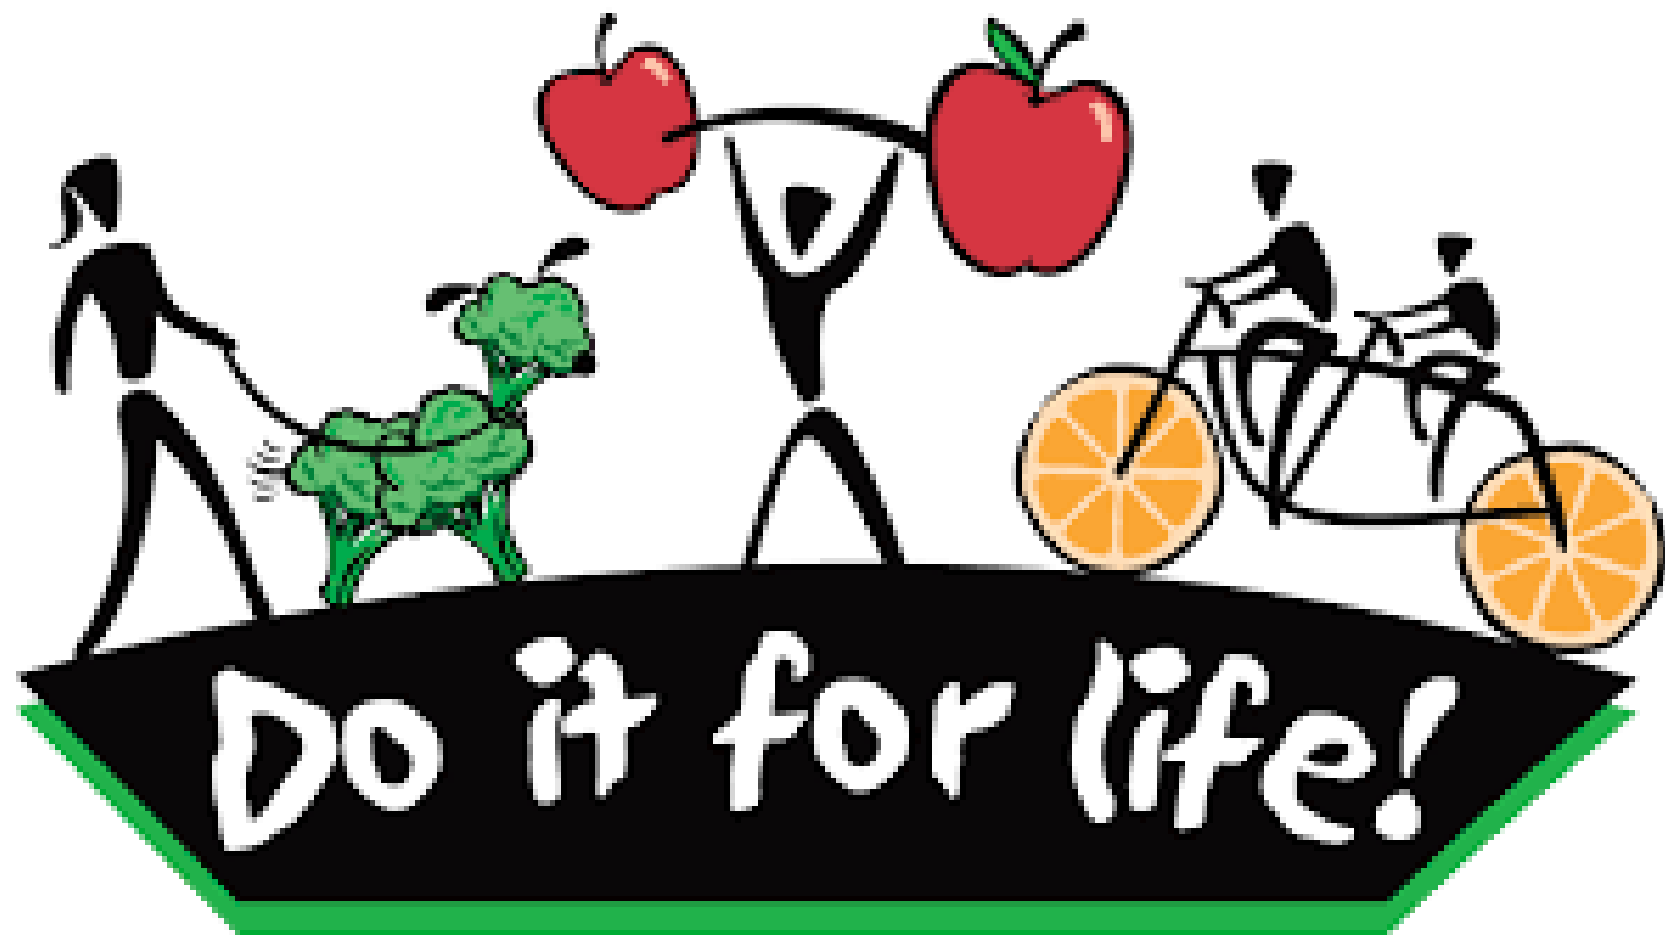

**Thank you**
